# Supplementary material
Source: PubMed Central journal article supplement (PMC4617654)
Supplement: NIHMS703905-supplement-1.pdf [file NIHMS703905-supplement-1.pdf]

Relative protein amounts in Eyelid. mol % is calculated as described by Ishihama, Y., et al., Exponentially modified protein abundance index (emPAI) for estimation of absolute protein amount in proteomics by the number of sequenced peptides per protein. Mol Cell Proteomics, 2005. 4(9): p. 1265-72

| Number | Eyelid specimen 1 - control           | Replicate 1 emPAI | Replicate 2 emPAI | Replicate 1 mol % | Replicate 2 mol % | Average mol % | Eyelid specimen 1 - deposits                                           | Replicate 1 emPAI | Replicate 2 emPAI | Replicate 1 mol % | Replicate 2 mol % | Average mol % |
|--------|---------------------------------------|-------------------|-------------------|-------------------|-------------------|---------------|------------------------------------------------------------------------|-------------------|-------------------|-------------------|-------------------|---------------|
| 1      | Ig kappa chain C region               | 17.1              | 23.2              | 58.6              | 64.7              | 61.7          | Ig kappa chain C region                                                | 23.2              | 31.4              | 55.6              | 61.0              | 58.3          |
| 2      | Hemoglobin subunit beta               | 1.9               | 1.9               | 6.6               | 5.4               | 6.0           | Apolipoprotein A-IV                                                    | 2.5               | 2.5               | 6.1               | 4.9               | 5.5           |
| 3      | Collagen alpha-1(I) chain             | 1.2               | 1.2               | 4.2               | 3.3               | 3.7           | Serum amyloid P-component                                              | 2.0               | 2.0               | 4.8               | 3.9               | 4.4           |
| 4      | Dermcidin                             | 0.8               | 1.4               | 2.8               | 4.0               | 3.4           | Collagen alpha-1(I) chain                                              | 1.5               | 1.8               | 3.7               | 3.5               | 3.6           |
| 5      | Hemoglobin subunit alpha              | 1.0               | 1.0               | 3.3               | 2.7               | 3.0           | Apolipoprotein E                                                       | 1.4               | 1.4               | 3.4               | 2.8               | 3.1           |
| 6      | Neutrophil defensin 1                 | 0.9               | 0.9               | 3.1               | 2.5               | 2.8           | Vitronectin                                                            | 1.2               | 1.3               | 2.8               | 2.6               | 2.7           |
| 7      | Apolipoprotein A-IV                   | 0.9               | 0.9               | 3.0               | 2.5               | 2.7           | Apolipoprotein A-I                                                     | 1.0               | 1.5               | 2.4               | 3.0               | 2.7           |
| 8      | Collagen alpha-2(I) chain             | 0.9               | 0.9               | 2.9               | 2.4               | 2.6           | Collagen alpha-2(I) chain                                              | 1.0               | 1.0               | 2.3               | 2.0               | 2.1           |
| 9      | Apolipoprotein E                      | 0.5               | 0.6               | 1.6               | 1.8               | 1.7           | Protein S100-A6                                                        | 0.9               | 0.9               | 2.2               | 1.8               | 2.0           |
| 10     | Collagen alpha-1(III) chain           | 0.4               | 0.6               | 1.4               | 1.6               | 1.5           | Neutrophil defensin 1                                                  | 0.9               | 0.9               | 2.2               | 1.8               | 2.0           |
| 11     | Vitronectin                           | 0.5               | 0.4               | 1.6               | 1.1               | 1.4           | Ig kappa chain V-III region WOL                                        | 0.8               | 0.8               | 1.9               | 1.5               | 1.7           |
| 12     | Serum amyloid P-component             | 0.5               | 0.3               | 1.7               | 0.9               | 1.3           | Collagen alpha-1(III) chain                                            | 0.6               | 0.8               | 1.5               | 1.6               | 1.6           |
| 13     | Serum albumin                         | 0.4               | 0.4               | 1.2               | 1.2               | 1.2           | Hemoglobin subunit beta                                                | 0.5               | 0.9               | 1.3               | 1.8               | 1.5           |
| 14     | Ig delta chain C region               | 0.4               | 0.3               | 1.4               | 0.8               | 1.1           | Hemoglobin subunit alpha                                               | 1.0               | 0.3               | 2.3               | 0.5               | 1.4           |
| 15     | Histone H4                            | 0.4               | 0.4               | 1.2               | 1.0               | 1.1           | Serum albumin                                                          | 0.6               | 0.5               | 1.4               | 1.0               | 1.2           |
| 16     | Ig kappa chain V-III region SIE       | 0.3               | 0.3               | 1.1               | 0.9               | 1.0           | Clusterin                                                              | 0.4               | 0.4               | 1.0               | 0.8               | 0.9           |
| 17     | Clusterin                             | 0.3               | 0.3               | 1.1               | 0.9               | 1.0           | Phospholipase A2, membrane associated                                  | 0.2               | 0.5               | 0.6               | 1.0               | 0.8           |
| 18     | Histone H2A type 1-A                  | 0.3               | 0.3               | 0.9               | 0.8               | 0.8           | Collagen alpha-1(VI) chain                                             | 0.3               | 0.4               | 0.7               | 0.8               | 0.7           |
| 19     | Phospholipase A2, membrane associated | 0.2               | 0.2               | 0.8               | 0.6               | 0.7           | Ig delta chain C region                                                | 0.3               | 0.3               | 0.7               | 0.6               | 0.6           |
| 20     | Collagen alpha-2(VI) chain            | 0.2               | 0.1               | 0.8               | 0.4               | 0.6           | Collagen alpha-3(VI) chain                                             | 0.3               | 0.3               | 0.6               | 0.6               | 0.6           |
| 21     | Collagen alpha-3(VI) chain            | 0.1               | 0.1               | 0.4               | 0.3               | 0.4           | Collagen alpha-2(VI) chain                                             | 0.2               | 0.3               | 0.5               | 0.5               | 0.5           |
| 22     | Collagen alpha-1(VI) chain            | 0.0               | 0.1               | 0.1               | 0.3               | 0.2           | Complement C1q subcomponent subunit C                                  | 0.2               | 0.2               | 0.4               | 0.3               | 0.3           |
| 23     | Filaggrin-2                           | 0.0               | 0.0               | 0.1               | 0.0               | 0.1           | Phospholipid transfer protein                                          | 0.1               | 0.1               | 0.3               | 0.3               | 0.3           |
| 24     |                                       |                   |                   |                   |                   |               | Carboxypeptidase B2                                                    | 0.1               | 0.2               | 0.2               | 0.3               | 0.3           |
| 25     |                                       |                   |                   |                   |                   |               | Fibulin-1                                                              | 0.1               | 0.2               | 0.1               | 0.4               | 0.2           |
| 26     |                                       |                   |                   |                   |                   |               | Complement component C9                                                | 0.1               | 0.1               | 0.1               | 0.2               | 0.2           |
| 27     |                                       |                   |                   |                   |                   |               | Collagen alpha-1(II) chain                                             | 0.1               | 0.1               | 0.2               | 0.2               | 0.2           |
| 28     |                                       |                   |                   |                   |                   |               | Plasminogen                                                            | 0.1               | 0.1               | 0.2               | 0.2               | 0.2           |
| 29     |                                       |                   |                   |                   |                   |               | Sushi repeat-containing protein SRPX                                   | 0.1               | 0.1               | 0.2               | 0.1               | 0.2           |
| 30     |                                       |                   |                   |                   |                   |               | Lipopolysaccharide-binding protein                                     | 0.1               | 0.1               | 0.2               | 0.1               | 0.2           |
| 31     |                                       |                   |                   |                   |                   |               | Insulin-like growth factor-binding protein complex acid labile subunit | 0.1               | 0.1               | 0.1               | 0.1               | 0.1           |

| Number | Eye lid specimen 2 - control            | Replicate 1 emPAI | Replicate 2 emPAI | Replicate 1 mol % | Replicate 2 mol % | Average mol % | Eye lid specimen 2 - deposits                                          | Replicate 1 emPAI | Replicate 2 emPAI | Replicate 1 mol % | Replicate 2 mol % | Average mol % |
|--------|-----------------------------------------|-------------------|-------------------|-------------------|-------------------|---------------|------------------------------------------------------------------------|-------------------|-------------------|-------------------|-------------------|---------------|
| 1      | Hemoglobin subunit beta                 | 12.3              | 9.7               | 16.0              | 15.6              | 15.8          | Ig lambda-2 chain C regions                                            | 156.6             | 63.5              | 65.0              | 45.7              | 55.3          |
| 2      | Hemoglobin subunit alpha                | 14.1              | 6.6               | 18.3              | 10.7              | 14.5          | Ig lambda chain V-III region LOI                                       | 8.8               | 12.0              | 3.6               | 8.6               | 6.1           |
| 3      | Collagen alpha-1(I) chain               | 8.3               | 9.8               | 10.8              | 15.8              | 13.3          | Hemoglobin subunit beta                                                | 4.6               | 6.0               | 1.9               | 4.3               | 3.1           |
| 4      | Collagen alpha-2(I) chain               | 4.8               | 4.8               | 6.2               | 7.7               | 7.0           | Immunoglobulin lambda-like polypeptide 5                               | 7.2               | 4.2               | 3.0               | 3.0               | 3.0           |
| 5      | Histone H4                              | 5.1               | 3.5               | 6.6               | 5.6               | 6.1           | Serum amyloid P-component                                              | 4.3               | 4.3               | 1.8               | 3.1               | 2.4           |
| 6      | Vimentin                                | 2.6               | 4.3               | 3.3               | 6.9               | 5.1           | Collagen alpha-1(I) chain                                              | 5.0               | 3.3               | 2.1               | 2.4               | 2.2           |
| 7      | Collagen alpha-1(III) chain             | 3.4               | 3.1               | 4.4               | 4.9               | 4.7           | Hemoglobin subunit alpha                                               | 2.9               | 3.9               | 1.2               | 2.8               | 2.0           |
| 8      | Ig lambda chain V-III region LOI        | 4.5               | 2.1               | 5.9               | 3.4               | 4.6           | Apolipoprotein A-I                                                     | 3.5               | 3.0               | 1.4               | 2.2               | 1.8           |
| 9      | Hemoglobin subunit delta                | 2.6               | 2.6               | 3.4               | 4.2               | 3.8           | Ig kappa chain C region                                                | 4.7               | 2.2               | 1.9               | 1.6               | 1.8           |
| 10     | Serum albumin                           | 2.4               | 2.4               | 3.1               | 3.8               | 3.4           | Collagen alpha-2(I) chain                                              | 3.5               | 2.5               | 1.5               | 1.8               | 1.6           |
| 11     | Actin, cytoplasmic 1                    | 2.0               | 1.3               | 2.6               | 2.2               | 2.4           | Apolipoprotein E                                                       | 4.3               | 2.0               | 1.8               | 1.4               | 1.6           |
| 12     | Histone H2A type 1-A                    | 1.6               | 1.1               | 2.1               | 1.7               | 1.9           | Collagen alpha-1(III) chain                                            | 2.8               | 1.8               | 1.1               | 1.3               | 1.2           |
| 13     | Ig lambda-2 chain C regions             | 1.4               | 0.8               | 1.9               | 1.3               | 1.6           | Vitronectin                                                            | 2.2               | 2.0               | 0.9               | 1.5               | 1.2           |
| 14     | Ig gamma-1 chain C region               | 0.8               | 0.8               | 1.0               | 1.3               | 1.1           | Vimentin                                                               | 2.8               | 1.6               | 1.2               | 1.1               | 1.1           |
| 15     | Ig gamma-3 chain C region               | 0.8               | 0.7               | 1.1               | 1.1               | 1.1           | Serum albumin                                                          | 2.0               | 1.9               | 0.8               | 1.4               | 1.1           |
| 16     | Protein S100-A6                         | 0.4               | 0.9               | 0.5               | 1.5               | 1.0           | Hemoglobin subunit delta                                               | 1.9               | 1.9               | 0.8               | 1.4               | 1.1           |
| 17     | Histone H2A.V                           | 0.7               | 0.7               | 0.9               | 1.1               | 1.0           | Apolipoprotein A-IV                                                    | 1.8               | 1.4               | 0.7               | 1.0               | 0.9           |
| 18     | Histone H1.2                            | 0.6               | 0.6               | 0.8               | 1.0               | 0.9           | Ig gamma-3 chain C region                                              | 1.0               | 1.1               | 0.4               | 0.8               | 0.6           |
| 19     | Ig kappa chain C region                 | 0.8               | 0.3               | 1.0               | 0.5               | 0.8           | Ig kappa chain V-III region SIE                                        | 1.4               | 0.8               | 0.6               | 0.6               | 0.6           |
| 20     | Serum amyloid P-component               | 0.5               | 0.5               | 0.7               | 0.8               | 0.7           | Ig gamma-1 chain C region                                              | 1.0               | 1.0               | 0.4               | 0.7               | 0.6           |
| 21     | Prelamin-A/C                            | 0.5               | 0.3               | 0.6               | 0.5               | 0.6           | Complement component C9                                                | 1.0               | 1.0               | 0.4               | 0.7               | 0.5           |
| 22     | Collagen alpha-3(VI) chain              | 0.4               | 0.4               | 0.5               | 0.6               | 0.5           | Protein S100-A6                                                        | 0.9               | 0.9               | 0.4               | 0.7               | 0.5           |
| 23     | Peroxiredoxin-1                         | 0.4               | 0.4               | 0.5               | 0.6               | 0.5           | Neutrophil defensin 1                                                  | 0.9               | 0.9               | 0.4               | 0.6               | 0.5           |
| 24     | Collagen alpha-1(VI) chain              | 0.4               | 0.3               | 0.5               | 0.5               | 0.5           | Ig kappa chain V-I region DEE                                          | 0.8               | 0.8               | 0.3               | 0.6               | 0.4           |
| 25     | Ig kappa chain V-III region SIE         | 0.3               | 0.3               | 0.4               | 0.5               | 0.5           | Apolipoprotein D                                                       | 0.9               | 0.6               | 0.4               | 0.5               | 0.4           |
| 26     | Ig heavy chain V-III region WEA         | 0.3               | 0.3               | 0.4               | 0.5               | 0.5           | Actin, cytoplasmic 1                                                   | 0.8               | 0.7               | 0.3               | 0.5               | 0.4           |
| 27     | Ig alpha-1 chain C region               | 0.5               | 0.2               | 0.6               | 0.3               | 0.5           | Apolipoprotein A-II                                                    | 0.4               | 0.8               | 0.1               | 0.6               | 0.4           |
| 28     | Tryptase delta                          | 0.3               | 0.3               | 0.4               | 0.5               | 0.4           | Histone H4                                                             | 0.4               | 0.8               | 0.1               | 0.6               | 0.4           |
| 29     | Ferritin light chain                    | 0.4               | 0.2               | 0.5               | 0.3               | 0.4           | Ig gamma-4 chain C region                                              | 0.6               | 0.6               | 0.3               | 0.5               | 0.4           |
| 30     | Apolipoprotein E                        | 0.5               | 0.1               | 0.6               | 0.2               | 0.4           | Collagen alpha-3(VI) chain                                             | 0.7               | 0.5               | 0.3               | 0.4               | 0.3           |
| 31     | Lumican                                 | 0.3               | 0.2               | 0.4               | 0.3               | 0.4           | Histone H2B type 1-A                                                   | 0.3               | 0.6               | 0.1               | 0.4               | 0.3           |
| 32     | Histone H3.3C                           | 0.3               | 0.3               | 0.3               | 0.4               | 0.4           | Collagen alpha-1(VI) chain                                             | 0.5               | 0.5               | 0.2               | 0.4               | 0.3           |
| 33     | Collagen alpha-2(VI) chain              | 0.3               | 0.2               | 0.3               | 0.4               | 0.3           | Clusterin                                                              | 0.6               | 0.4               | 0.3               | 0.3               | 0.3           |
| 34     | Collagen alpha-1(II) chain              | 0.2               | 0.2               | 0.2               | 0.4               | 0.3           | Complement component C8 gamma chain                                    | 0.6               | 0.4               | 0.2               | 0.3               | 0.3           |
| 35     | Vitronectin                             | 0.3               | 0.1               | 0.4               | 0.2               | 0.3           | Phospholipase A2, membrane associated                                  | 0.2               | 0.5               | 0.1               | 0.4               | 0.2           |
| 36     | Ubiquitin-40S ribosomal protein S27a    | 0.2               | 0.2               | 0.3               | 0.3               | 0.3           | Apolipoprotein C-III                                                   | 0.4               | 0.4               | 0.2               | 0.3               | 0.2           |
| 37     | Mast cell carboxypeptidase A            | 0.3               | 0.2               | 0.3               | 0.3               | 0.3           | Protein AMBP                                                           | 0.4               | 0.3               | 0.2               | 0.2               | 0.2           |
| 38     | Decorin                                 | 0.2               | 0.2               | 0.3               | 0.3               | 0.3           | Dermcidin                                                              | 0.4               | 0.4               | 0.1               | 0.3               | 0.2           |
| 39     | Annexin A5                              | 0.1               | 0.2               | 0.1               | 0.4               | 0.2           | Transthyretin                                                          | 0.5               | 0.2               | 0.2               | 0.2               | 0.2           |
| 40     | Annexin A2                              | 0.2               | 0.1               | 0.3               | 0.2               | 0.2           | Phospholipid transfer protein                                          | 0.4               | 0.3               | 0.2               | 0.2               | 0.2           |
| 41     | Endoplasmic                             | 0.2               | 0.1               | 0.3               | 0.1               | 0.2           | Ig kappa chain V-I region EU                                           | 0.3               | 0.3               | 0.1               | 0.2               | 0.2           |
| 42     | Apolipoprotein A-IV                     | 0.2               | 0.1               | 0.2               | 0.1               | 0.2           | Ig lambda chain V-I region HA                                          | 0.3               | 0.3               | 0.1               | 0.2               | 0.2           |
| 43     | Thioredoxin domain-containing protein 5 | 0.2               | 0.1               | 0.2               | 0.1               | 0.2           | Annexin A2                                                             | 0.3               | 0.3               | 0.1               | 0.2               | 0.2           |
| 44     | Tropomyosin alpha-1 chain               | 0.1               | 0.1               | 0.1               | 0.2               | 0.2           | Ig kappa chain V-II region Cum                                         | 0.3               | 0.3               | 0.1               | 0.2               | 0.2           |
| 45     | L-lactate dehydrogenase A chain         | 0.1               | 0.1               | 0.1               | 0.2               | 0.1           | Matrix Gla protein                                                     | 0.3               | 0.3               | 0.1               | 0.2               | 0.2           |
| 46     | Collagen alpha-1(V) chain               | 0.1               | 0.1               | 0.1               | 0.2               | 0.1           | Ig kappa chain V-III region VG                                         | 0.3               | 0.3               | 0.1               | 0.2               | 0.2           |
| 47     | Collagen alpha-1(XIV) chain             | 0.1               | 0.1               | 0.1               | 0.1               | 0.1           | Collagen alpha-2(VI) chain                                             | 0.3               | 0.3               | 0.1               | 0.2               | 0.2           |
| 48     | Plastin-2                               | 0.1               | 0.1               | 0.1               | 0.1               | 0.1           | Peroxiredoxin-1                                                        | 0.2               | 0.4               | 0.1               | 0.3               | 0.2           |
| 49     | Fibrillin-1                             | 0.0               | 0.0               | 0.0               | 0.0               | 0.0           | Insulin-like growth factor-binding protein complex acid labile subunit | 0.5               | 0.2               | 0.2               | 0.1               | 0.2           |
| 50     |                                         |                   |                   |                   |                   |               | Peptidyl-prolyl cis-trans isomerase B                                  | 0.2               | 0.4               | 0.1               | 0.3               | 0.2           |
| 51     |                                         |                   |                   |                   |                   |               | Fibulin-1                                                              | 0.3               | 0.3               | 0.1               | 0.2               | 0.2           |
| 52     |                                         |                   |                   |                   |                   |               | Histone H2A type 1-A                                                   | 0.3               | 0.3               | 0.1               | 0.2               | 0.2           |
| 53     |                                         |                   |                   |                   |                   |               | EGF-containing fibulin-like extracellular matrix protein 1             | 0.2               | 0.3               | 0.1               | 0.2               | 0.1           |
| 54     |                                         |                   |                   |                   |                   |               | Alpha-1-antichymotrypsin                                               | 0.3               | 0.3               | 0.1               | 0.2               | 0.1           |
| 55     |                                         |                   |                   |                   |                   |               | Lysozyme C                                                             | 0.2               | 0.2               | 0.1               | 0.2               | 0.1           |
| 56     |                                         |                   |                   |                   |                   |               | Carboxypeptidase B2                                                    | 0.2               | 0.3               | 0.1               | 0.2               | 0.1           |
| 57     |                                         |                   |                   |                   |                   |               | ADP-ribosylation factor 1                                              | 0.2               | 0.2               | 0.1               | 0.1               | 0.1           |
| 58     |                                         |                   |                   |                   |                   |               | Prostaglandin-H2 D-isomerase                                           | 0.2               | 0.2               | 0.1               | 0.1               | 0.1           |
| 59     |                                         |                   |                   |                   |                   |               | Prelamin-A/C                                                           | 0.2               | 0.2               | 0.1               | 0.1               | 0.1           |
| 60     |                                         |                   |                   |                   |                   |               | Complement factor H-related protein 1                                  | 0.1               | 0.2               | 0.0               | 0.1               | 0.1           |
| 61     |                                         |                   |                   |                   |                   |               | Dermatopontin                                                          | 0.2               | 0.2               | 0.1               | 0.1               | 0.1           |
| 62     |                                         |                   |                   |                   |                   |               | Collagen alpha-1(II) chain                                             | 0.2               | 0.1               | 0.1               | 0.1               | 0.1           |

| Number | Eyelid specimen 2 - control | Replicate 1 emPAI | Replicate 2 emPAI | Replicate 1 mol % | Replicate 2 mol % | Average mol % | Eyelid specimen 2 - deposits         | Replicate 1 emPAI | Replicate 2 emPAI | Replicate 1 mol % | Replicate 2 mol % | Average mol % |
|--------|-----------------------------|-------------------|-------------------|-------------------|-------------------|---------------|--------------------------------------|-------------------|-------------------|-------------------|-------------------|---------------|
| 63     |                             |                   |                   |                   |                   |               | Annexin A5                           | 0.2               | 0.1               | 0.1               | 0.1               | 0.1           |
| 64     |                             |                   |                   |                   |                   |               | Kallistatin                          | 0.3               | 0.1               | 0.1               | 0.1               | 0.1           |
| 65     |                             |                   |                   |                   |                   |               | Complement C3                        | 0.1               | 0.1               | 0.1               | 0.1               | 0.1           |
| 66     |                             |                   |                   |                   |                   |               | Sushi repeat-containing protein SRPX | 0.1               | 0.2               | 0.0               | 0.1               | 0.1           |
| 67     |                             |                   |                   |                   |                   |               | Secreted frizzled-related protein 2  | 0.1               | 0.1               | 0.0               | 0.1               | 0.1           |
| 68     |                             |                   |                   |                   |                   |               | Tropomyosin alpha-1 chain            | 0.1               | 0.1               | 0.0               | 0.1               | 0.1           |
| 69     |                             |                   |                   |                   |                   |               | Collagen alpha-1(XIV) chain          | 0.1               | 0.1               | 0.0               | 0.1               | 0.1           |
| 70     |                             |                   |                   |                   |                   |               | Plasminogen                          | 0.1               | 0.1               | 0.0               | 0.1               | 0.1           |
| 71     |                             |                   |                   |                   |                   |               | Lumican                              | 0.1               | 0.1               | 0.0               | 0.1               | 0.1           |
| 72     |                             |                   |                   |                   |                   |               | Pigment epithelium-derived factor    | 0.1               | 0.1               | 0.0               | 0.1               | 0.0           |
| 73     |                             |                   |                   |                   |                   |               | Complement component C8 beta chain   | 0.1               | 0.1               | 0.0               | 0.0               | 0.0           |
| 74     |                             |                   |                   |                   |                   |               | Coagulation factor IX                | 0.1               | 0.1               | 0.0               | 0.1               | 0.0           |
| 75     |                             |                   |                   |                   |                   |               | Lipopolysaccharide-binding protein   | 0.1               | 0.1               | 0.0               | 0.1               | 0.0           |
| 76     |                             |                   |                   |                   |                   |               | Serine protease HTRA1                | 0.1               | 0.1               | 0.0               | 0.1               | 0.0           |
| 77     |                             |                   |                   |                   |                   |               | Prothrombin                          | 0.1               | 0.1               | 0.0               | 0.0               | 0.0           |
| 78     |                             |                   |                   |                   |                   |               | Collagen alpha-1(V) chain            | 0.0               | 0.0               | 0.0               | 0.0               | 0.0           |
| 79     |                             |                   |                   |                   |                   |               | Cadherin-1                           | 0.0               | 0.0               | 0.0               | 0.0               | 0.0           |
| 80     |                             |                   |                   |                   |                   |               | Collagen alpha-2(V) chain            | 0.0               | 0.0               | 0.0               | 0.0               | 0.0           |
| 81     |                             |                   |                   |                   |                   |               | Filaggrin-2                          | 0.0               | 0.0               | 0.0               | 0.0               | 0.0           |
| 82     |                             |                   |                   |                   |                   |               | Collagen alpha-1(XVIII) chain        | 0.0               | 0.0               | 0.0               | 0.0               | 0.0           |
| 83     |                             |                   |                   |                   |                   |               | Fibrillin-1                          | 0.0               | 0.0               | 0.0               | 0.0               | 0.0           |

| Number | Eyelid specimen 3 - control          | Replicate 1 emPAI | Replicate 2 emPAI | Replicate 1 mol % | Replicate 2 mol % | Average mol % | Eyelid specimen 3 - deposits                                         | Replicate 1 emPAI | Replicate 2 emPAI | Replicate 1 mol % | Replicate 2 mol % | Average mol % |
|--------|--------------------------------------|-------------------|-------------------|-------------------|-------------------|---------------|----------------------------------------------------------------------|-------------------|-------------------|-------------------|-------------------|---------------|
| 1      | Hemoglobin subunit beta              | 797.3             | 517.7             | 56.0              | 59.4              | 57.7          | Ig lambda-2 chain C regions                                          | 34.6              | 383.9             | 25.8              | 79.8              | 52.8          |
| 2      | Hemoglobin subunit alpha             | 558.2             | 282.9             | 39.2              | 32.5              | 35.9          | Hemoglobin subunit beta                                              | 24.4              | 19.5              | 18.2              | 4.0               | 11.1          |
| 3      | Hemoglobin subunit delta             | 15.2              | 23.8              | 1.1               | 2.7               | 1.9           | Hemoglobin subunit alpha                                             | 11.0              | 14.1              | 8.2               | 2.9               | 5.6           |
| 4      | Collagen alpha-1(I) chain            | 16.3              | 13.8              | 1.1               | 1.6               | 1.4           | Collagen alpha-1(I) chain                                            | 7.6               | 6.4               | 5.7               | 1.3               | 3.5           |
| 5      | Collagen alpha-2(I) chain            | 9.4               | 6.7               | 0.7               | 0.8               | 0.7           | Collagen alpha-2(I) chain                                            | 5.0               | 4.2               | 3.7               | 0.9               | 2.3           |
| 6      | Ig lambda-2 chain C regions          | 5.0               | 3.4               | 0.3               | 0.4               | 0.4           | Apolipoprotein A-IV                                                  | 4.2               | 5.6               | 3.2               | 1.2               | 2.2           |
| 7      | Hemoglobin subunit gamma-2           | 1.9               | 4.6               | 0.1               | 0.5               | 0.3           | Apolipoprotein A-I                                                   | 4.7               | 4.0               | 3.5               | 0.8               | 2.2           |
| 8      | Hemoglobin subunit gamma-1           | 1.9               | 4.6               | 0.1               | 0.5               | 0.3           | Hemoglobin subunit delta                                             | 3.5               | 5.9               | 2.6               | 1.2               | 1.9           |
| 9      | Collagen alpha-1(III) chain          | 3.3               | 2.9               | 0.2               | 0.3               | 0.3           | Collagen alpha-1(III) chain                                          | 3.5               | 3.2               | 2.6               | 0.7               | 1.6           |
| 10     | Carbonic anhydrase 1                 | 1.7               | 1.4               | 0.1               | 0.2               | 0.1           | Vimentin                                                             | 3.1               | 4.0               | 2.3               | 0.8               | 1.6           |
| 11     | Fibrinogen beta chain                | 1.4               | 1.1               | 0.1               | 0.1               | 0.1           | Serum amyloid P-component                                            | 3.0               | 3.6               | 2.2               | 0.7               | 1.5           |
| 12     | Fibrinogen gamma chain               | 1.3               | 0.9               | 0.1               | 0.1               | 0.1           | Ig lambda chain V-I region BL2                                       | 3.5               | 1.7               | 2.6               | 0.4               | 1.5           |
| 13     | Peroxiredoxin-2                      | 1.2               | 0.9               | 0.1               | 0.1               | 0.1           | Vitronectin                                                          | 2.2               | 2.2               | 1.7               | 0.5               | 1.1           |
| 14     | Neutrophil defensin 1                | 0.9               | 0.9               | 0.1               | 0.1               | 0.1           | Ig kappa chain C region                                              | 2.2               | 2.2               | 1.6               | 0.5               | 1.0           |
| 15     | Histone H4                           | 0.8               | 0.8               | 0.1               | 0.1               | 0.1           | Serum albumin                                                        | 2.2               | 2.0               | 1.6               | 0.4               | 1.0           |
| 16     | Serum albumin                        | 0.9               | 0.7               | 0.1               | 0.1               | 0.1           | Apolipoprotein E                                                     | 2.0               | 2.0               | 1.5               | 0.4               | 0.9           |
| 17     | Fibrinogen alpha chain               | 0.5               | 0.5               | 0.0               | 0.1               | 0.0           | Ig lambda chain V-I region NIG-64                                    | 2.3               | 0.8               | 1.7               | 0.2               | 0.9           |
| 18     | Apolipoprotein A-IV                  | 0.5               | 0.5               | 0.0               | 0.1               | 0.0           | Collagen alpha-3(VI) chain                                           | 1.1               | 1.2               | 0.8               | 0.2               | 0.5           |
| 19     | Vimentin                             | 0.6               | 0.4               | 0.0               | 0.0               | 0.0           | Actin, cytoplasmic 1                                                 | 1.2               | 0.8               | 0.9               | 0.2               | 0.5           |
| 20     | Dermcidin                            | 0.4               | 0.4               | 0.0               | 0.0               | 0.0           | Collagen alpha-1(VI) chain                                           | 0.9               | 1.0               | 0.6               | 0.2               | 0.4           |
| 21     | Serum amyloid P-component            | 0.3               | 0.3               | 0.0               | 0.0               | 0.0           | Protein S100-A6                                                      | 0.9               | 0.4               | 0.7               | 0.1               | 0.4           |
| 22     | Carbonic anhydrase 2                 | 0.3               | 0.3               | 0.0               | 0.0               | 0.0           | Actin, aortic smooth muscle                                          | 0.8               | 0.7               | 0.6               | 0.1               | 0.4           |
| 23     | Vitronectin                          | 0.3               | 0.2               | 0.0               | 0.0               | 0.0           | Collagen alpha-2(VI) chain                                           | 0.8               | 0.8               | 0.6               | 0.2               | 0.4           |
| 24     | Histone H3.3C                        | 0.3               | 0.3               | 0.0               | 0.0               | 0.0           | Transthyretin                                                        | 0.5               | 1.4               | 0.4               | 0.3               | 0.3           |
| 25     | Flavin reductase (NADPH)             | 0.4               | 0.2               | 0.0               | 0.0               | 0.0           | Ig gamma-1 chain C region                                            | 0.6               | 0.8               | 0.5               | 0.2               | 0.3           |
| 26     | Collagen alpha-3(VI) chain           | 0.3               | 0.2               | 0.0               | 0.0               | 0.0           | Immunoglobulin lambda-like polypeptide 1                             | 0.6               | 0.8               | 0.4               | 0.2               | 0.3           |
| 27     | Band 3 anion transport protein       | 0.3               | 0.2               | 0.0               | 0.0               | 0.0           | Ig gamma-2 chain C region                                            | 0.6               | 0.6               | 0.5               | 0.1               | 0.3           |
| 28     | Ubiquitin-40S ribosomal protein S27a | 0.2               | 0.2               | 0.0               | 0.0               | 0.0           | Histone H2A type 1-A                                                 | 0.6               | 0.6               | 0.5               | 0.1               | 0.3           |
| 29     | Collagen alpha-1(VI) chain           | 0.3               | 0.1               | 0.0               | 0.0               | 0.0           | Complement component C9                                              | 0.6               | 0.5               | 0.4               | 0.1               | 0.3           |
| 30     | Catalase                             | 0.3               | 0.1               | 0.0               | 0.0               | 0.0           | Clusterin                                                            | 0.4               | 0.5               | 0.3               | 0.1               | 0.2           |
| 31     | Collagen alpha-1(II) chain           | 0.2               | 0.1               | 0.0               | 0.0               | 0.0           | Ig delta chain C region                                              | 0.4               | 0.4               | 0.3               | 0.1               | 0.2           |
| 32     | Collagen alpha-2(VI) chain           | 0.2               | 0.1               | 0.0               | 0.0               | 0.0           | Histone H4                                                           | 0.4               | 0.4               | 0.3               | 0.1               | 0.2           |
| 33     | Dermatopontin                        | 0.2               | 0.2               | 0.0               | 0.0               | 0.0           | Ig kappa chain V-I region Lay                                        | 0.3               | 0.3               | 0.2               | 0.1               | 0.2           |
| 34     | Mimecan                              | 0.1               | 0.1               | 0.0               | 0.0               | 0.0           | Ig kappa chain V-II region Cum                                       | 0.3               | 0.3               | 0.2               | 0.1               | 0.1           |
| 35     | Lumican                              | 0.1               | 0.1               | 0.0               | 0.0               | 0.0           | Ig kappa chain V-III region VG                                       | 0.3               | 0.3               | 0.2               | 0.1               | 0.1           |
| 36     | Collagen alpha-1(V) chain            | 0.1               | 0.0               | 0.0               | 0.0               | 0.0           | Matrix Gla protein                                                   | 0.3               | 0.3               | 0.2               | 0.1               | 0.1           |
| 37     | Collagen alpha-2(V) chain            | 0.1               | 0.0               | 0.0               | 0.0               | 0.0           | Carbonic anhydrase 1                                                 | 0.3               | 0.3               | 0.2               | 0.1               | 0.1           |
| 38     | Filaggrin-2                          | 0.0               | 0.0               | 0.0               | 0.0               | 0.0           | Prelamin-A/C                                                         | 0.3               | 0.2               | 0.2               | 0.0               | 0.1           |
| 39     |                                      |                   |                   |                   |                   |               | Fibrinogen gamma chain                                               | 0.2               | 0.3               | 0.2               | 0.1               | 0.1           |
| 40     |                                      |                   |                   |                   |                   |               | Fibrinogen beta chain                                                | 0.2               | 0.3               | 0.2               | 0.1               | 0.1           |
| 41     |                                      |                   |                   |                   |                   |               | Collagen alpha-1(II) chain                                           | 0.2               | 0.1               | 0.2               | 0.0               | 0.1           |
| 42     |                                      |                   |                   |                   |                   |               | Gelsolin                                                             | 0.2               | 0.1               | 0.2               | 0.0               | 0.1           |
| 43     |                                      |                   |                   |                   |                   |               | Annexin A2                                                           | 0.2               | 0.2               | 0.1               | 0.0               | 0.1           |
| 44     |                                      |                   |                   |                   |                   |               | Collagen alpha-1(XIV) chain                                          | 0.2               | 0.2               | 0.1               | 0.0               | 0.1           |
| 45     |                                      |                   |                   |                   |                   |               | Plasminogen                                                          | 0.2               | 0.2               | 0.1               | 0.0               | 0.1           |
| 46     |                                      |                   |                   |                   |                   |               | Heat shock protein beta-1                                            | 0.2               | 0.2               | 0.1               | 0.0               | 0.1           |
| 47     |                                      |                   |                   |                   |                   |               | Sushi repeat-containing protein SRPX                                 | 0.2               | 0.2               | 0.1               | 0.0               | 0.1           |
| 48     |                                      |                   |                   |                   |                   |               | Kallistatin                                                          | 0.2               | 0.2               | 0.1               | 0.0               | 0.1           |
| 49     |                                      |                   |                   |                   |                   |               | Fibrinogen alpha chain                                               | 0.2               | 0.1               | 0.1               | 0.0               | 0.1           |
| 50     |                                      |                   |                   |                   |                   |               | Transforming growth factor-beta-induced protein ig-h3                | 0.2               | 0.2               | 0.1               | 0.0               | 0.1           |
| 51     |                                      |                   |                   |                   |                   |               | Carboxypeptidase B2                                                  | 0.2               | 0.1               | 0.1               | 0.0               | 0.1           |
| 52     |                                      |                   |                   |                   |                   |               | Fibulin-1                                                            | 0.1               | 0.1               | 0.1               | 0.0               | 0.1           |
| 53     |                                      |                   |                   |                   |                   |               | Tropomyosin alpha-1 chain                                            | 0.1               | 0.1               | 0.1               | 0.0               | 0.1           |
| 54     |                                      |                   |                   |                   |                   |               | Collagen alpha-1(VIII) chain                                         | 0.1               | 0.1               | 0.1               | 0.0               | 0.0           |
| 55     |                                      |                   |                   |                   |                   |               | Lumican                                                              | 0.1               | 0.1               | 0.1               | 0.0               | 0.0           |
| 56     |                                      |                   |                   |                   |                   |               | Serotransferrin                                                      | 0.1               | 0.1               | 0.1               | 0.0               | 0.0           |
| 57     |                                      |                   |                   |                   |                   |               | Alpha-1-antichymotrypsin                                             | 0.1               | 0.1               | 0.1               | 0.0               | 0.0           |
| 58     |                                      |                   |                   |                   |                   |               | Complement C3                                                        | 0.1               | 0.1               | 0.1               | 0.0               | 0.0           |
| 59     |                                      |                   |                   |                   |                   |               | Lipopolysaccharide-binding protein                                   | 0.1               | 0.1               | 0.1               | 0.0               | 0.0           |
| 60     |                                      |                   |                   |                   |                   |               | Collagen alpha-1(V) chain                                            | 0.1               | 0.1               | 0.0               | 0.0               | 0.0           |
| 61     |                                      |                   |                   |                   |                   |               | Fibronectin                                                          | 0.0               | 0.0               | 0.0               | 0.0               | 0.0           |
| 62     |                                      |                   |                   |                   |                   |               | Tenascin                                                             | 0.0               | 0.1               | 0.0               | 0.0               | 0.0           |
| 63     |                                      |                   |                   |                   |                   |               | Basement membrane-specific heparan sulfate proteoglycan core protein | 0.0               | 0.0               | 0.0               | 0.0               | 0.0           |
| 64     |                                      |                   |                   |                   |                   |               | Fibulin-2                                                            | 0.0               | 0.0               | 0.0               | 0.0               | 0.0           |

Relative protein amounts in Conjunctiva. mol % is calculated as described by Ishihama, Y., et al., Exponentially modified protein abundance index (emPAI) for estimation of absolute protein amount in proteomics by the number of sequenced peptides per protein. Mol Cell Proteomics, 2005. 4(9): p. 1265-72

| Number | Conjunctiva - control                                       | Replicate 1 emPAI | Replicate 2 emPAI | Replicate 1 mol % | Replicate 2 mol % | Average mol % | Conjunctiva - deposits                                                 | Replicate 1 emPAI | Replicate 2 emPAI | Replicate 1 mol % | Replicate 2 mol % | Average mol % |
|--------|-------------------------------------------------------------|-------------------|-------------------|-------------------|-------------------|---------------|------------------------------------------------------------------------|-------------------|-------------------|-------------------|-------------------|---------------|
| 1      | Collagen alpha-1(I) chain                                   | 22.6              | 22.6              | 22.0              | 21.3              | 21.7          | Ig kappa chain C region                                                | 183.2             | 136.8             | 77.7              | 74.2              | 75.9          |
| 2      | Ig kappa chain C region                                     | 17.1              | 12.6              | 16.7              | 11.9              | 14.3          | Hemoglobin subunit beta                                                | 7.6               | 4.6               | 3.2               | 2.5               | 2.9           |
| 3      | Collagen alpha-2(II) chain                                  | 10.7              | 9.4               | 10.4              | 8.9               | 9.6           | Collagen alpha-1(I) chain                                              | 4.0               | 3.5               | 1.7               | 1.9               | 1.8           |
| 4      | Hemoglobin subunit beta                                     | 3.5               | 7.6               | 3.4               | 7.2               | 5.3           | Collagen alpha-2(I) chain                                              | 4.1               | 2.8               | 1.7               | 1.5               | 1.6           |
| 5      | Histone H2B type 1-B                                        | 4.6               | 6.2               | 4.5               | 5.8               | 5.2           | Hemoglobin subunit alpha                                               | 2.9               | 2.9               | 1.2               | 1.6               | 1.4           |
| 6      | Vimentin                                                    | 5.5               | 5.1               | 5.4               | 4.8               | 5.1           | Vimentin                                                               | 1.7               | 2.3               | 0.7               | 1.3               | 1.0           |
| 7      | Collagen alpha-1(III) chain                                 | 5.0               | 4.8               | 4.9               | 4.6               | 4.7           | Apolipoprotein A-IV                                                    | 1.8               | 2.3               | 0.8               | 1.2               | 1.0           |
| 8      | Histone H4                                                  | 3.5               | 5.1               | 3.4               | 4.8               | 4.1           | Serum amyloid P-component                                              | 1.3               | 2.5               | 0.5               | 1.3               | 0.9           |
| 9      | Actin, cytoplasmic 1                                        | 3.6               | 3.2               | 3.5               | 3.1               | 3.3           | Serum albumin                                                          | 1.6               | 2.2               | 0.7               | 1.2               | 0.9           |
| 10     | Hemoglobin subunit alpha                                    | 2.9               | 3.9               | 2.8               | 3.6               | 3.2           | Collagen alpha-1(III) chain                                            | 1.6               | 1.8               | 0.7               | 0.9               | 0.8           |
| 11     | Hemoglobin subunit delta                                    | 1.4               | 1.9               | 1.3               | 1.8               | 1.6           | Apolipoprotein E                                                       | 1.7               | 1.7               | 0.7               | 0.9               | 0.8           |
| 12     | Serum albumin                                               | 1.3               | 1.6               | 1.2               | 1.5               | 1.4           | Apolipoprotein A-I                                                     | 1.5               | 1.5               | 0.6               | 0.8               | 0.7           |
| 13     | Prelamin-A/C                                                | 1.1               | 1.2               | 1.0               | 1.1               | 1.1           | Vitronectin                                                            | 1.8               | 0.9               | 0.8               | 0.5               | 0.6           |
| 14     | Histone H2A type 1-A                                        | 1.1               | 1.1               | 1.0               | 1.0               | 1.0           | Histone H4                                                             | 1.5               | 0.8               | 0.6               | 0.4               | 0.5           |
| 15     | Annexin A2                                                  | 1.1               | 0.9               | 1.1               | 0.8               | 1.0           | Ig kappa chain V-III region SIE                                        | 1.4               | 0.8               | 0.6               | 0.4               | 0.5           |
| 16     | Protein S100-A6                                             | 0.9               | 0.9               | 0.9               | 0.9               | 0.9           | Protein S100-A6                                                        | 0.9               | 0.9               | 0.4               | 0.5               | 0.5           |
| 17     | Histone H2A.V                                               | 0.7               | 1.1               | 0.6               | 1.1               | 0.9           | Actin, cytoplasmic 1                                                   | 1.0               | 0.8               | 0.4               | 0.4               | 0.4           |
| 18     | Ig alpha-1 chain C region                                   | 0.9               | 0.6               | 0.9               | 0.6               | 0.7           | Ig lambda-2 chain C regions                                            | 0.8               | 0.8               | 0.3               | 0.4               | 0.4           |
| 19     | Glyceraldehyde-3-phosphate dehydrogenase                    | 0.6               | 0.8               | 0.6               | 0.8               | 0.7           | Ig alpha-1 chain C region                                              | 0.6               | 0.9               | 0.3               | 0.5               | 0.4           |
| 20     | Tubulin beta chain                                          | 0.7               | 0.7               | 0.6               | 0.6               | 0.6           | Collagen alpha-1(VI) chain                                             | 0.5               | 0.7               | 0.2               | 0.4               | 0.3           |
| 21     | Histone H1.2                                                | 0.6               | 0.6               | 0.6               | 0.6               | 0.6           | Collagen alpha-3(VI) chain                                             | 0.7               | 0.6               | 0.3               | 0.3               | 0.3           |
| 22     | Neutrophil defensin 1                                       | 0.4               | 0.9               | 0.4               | 0.8               | 0.6           | Clusterin                                                              | 0.5               | 0.7               | 0.2               | 0.4               | 0.3           |
| 23     | Peroxiredoxin-1                                             | 0.6               | 0.6               | 0.6               | 0.6               | 0.6           | Histone H2A type 1-A                                                   | 0.6               | 0.6               | 0.3               | 0.3               | 0.3           |
| 24     | Histone H3.3                                                | 0.6               | 0.6               | 0.6               | 0.5               | 0.5           | Collagen alpha-2(VI) chain                                             | 0.6               | 0.5               | 0.3               | 0.3               | 0.3           |
| 25     | Collagen alpha-3(VI) chain                                  | 0.5               | 0.5               | 0.5               | 0.5               | 0.5           | Annexin A2                                                             | 0.7               | 0.4               | 0.3               | 0.2               | 0.3           |
| 26     | Ig gamma-3 chain C region                                   | 0.5               | 0.5               | 0.5               | 0.5               | 0.5           | Transferrin                                                            | 0.5               | 0.5               | 0.2               | 0.3               | 0.3           |
| 27     | Transgelin-2                                                | 0.6               | 0.4               | 0.6               | 0.3               | 0.5           | Actin, aortic smooth muscle                                            | 0.5               | 0.5               | 0.2               | 0.3               | 0.3           |
| 28     | Tubulin alpha-1A chain                                      | 0.5               | 0.3               | 0.5               | 0.3               | 0.4           | Lysozyme C                                                             | 0.5               | 0.5               | 0.2               | 0.3               | 0.2           |
| 29     | Profilin-1                                                  | 0.3               | 0.6               | 0.3               | 0.5               | 0.4           | Phospholipase A2, membrane associated                                  | 0.5               | 0.5               | 0.2               | 0.3               | 0.2           |
| 30     | Ig gamma-1 chain C region                                   | 0.3               | 0.5               | 0.3               | 0.5               | 0.4           | Phospholipid transfer protein                                          | 0.5               | 0.5               | 0.2               | 0.3               | 0.2           |
| 31     | Collagen alpha-1(VI) chain                                  | 0.4               | 0.4               | 0.3               | 0.4               | 0.4           | Ig delta chain C region                                                | 0.4               | 0.5               | 0.2               | 0.3               | 0.2           |
| 32     | Ig lambda-2 chain C regions                                 | 0.4               | 0.4               | 0.3               | 0.3               | 0.3           | Ig gamma-3 chain C region                                              | 0.5               | 0.4               | 0.2               | 0.2               | 0.2           |
| 33     | Ig gamma-2 chain C region                                   | 0.3               | 0.3               | 0.3               | 0.3               | 0.3           | Neutrophil defensin 1                                                  | 0.4               | 0.4               | 0.2               | 0.2               | 0.2           |
| 34     | Ig kappa chain V-I region Lay                               | 0.3               | 0.3               | 0.3               | 0.3               | 0.3           | Pigment epithelium-derived factor                                      | 0.5               | 0.3               | 0.2               | 0.1               | 0.2           |
| 35     | Ig kappa chain V-III region SIE                             | 0.3               | 0.3               | 0.3               | 0.3               | 0.3           | Annexin A5                                                             | 0.4               | 0.4               | 0.1               | 0.2               | 0.2           |
| 36     | Ig heavy chain V-III region WEA                             | 0.3               | 0.3               | 0.3               | 0.3               | 0.3           | C-C motif chemokine 19                                                 | 0.4               | 0.4               | 0.1               | 0.2               | 0.2           |
| 37     | Alpha-crystallin A chain                                    | 0.4               | 0.2               | 0.4               | 0.2               | 0.3           | Immunoglobulin lambda-like polypeptide 5                               | 0.4               | 0.4               | 0.1               | 0.2               | 0.2           |
| 38     | Collagen alpha-1(II) chain                                  | 0.3               | 0.3               | 0.3               | 0.3               | 0.3           | Ig gamma-1 chain C region                                              | 0.3               | 0.3               | 0.1               | 0.2               | 0.2           |
| 39     | Alpha-enolase                                               | 0.4               | 0.3               | 0.3               | 0.2               | 0.3           | Ig gamma-2 chain C region                                              | 0.3               | 0.3               | 0.1               | 0.2               | 0.2           |
| 40     | Trypsin delta                                               | 0.3               | 0.3               | 0.3               | 0.3               | 0.3           | Ig kappa chain V-I region Lay                                          | 0.3               | 0.3               | 0.1               | 0.2               | 0.2           |
| 41     | Annexin A5                                                  | 0.2               | 0.4               | 0.2               | 0.3               | 0.3           | Complement component C9                                                | 0.3               | 0.3               | 0.1               | 0.2               | 0.2           |
| 42     | Apolipoprotein A-IV                                         | 0.3               | 0.3               | 0.3               | 0.3               | 0.3           | Apolipoprotein D                                                       | 0.4               | 0.2               | 0.2               | 0.1               | 0.1           |
| 43     | Activated RNA polymerase II transcriptional coactivator p15 | 0.3               | 0.3               | 0.3               | 0.3               | 0.3           | Alpha-1-antitrypsin                                                    | 0.3               | 0.3               | 0.1               | 0.1               | 0.1           |
| 44     | Endoplasmic                                                 | 0.3               | 0.3               | 0.3               | 0.2               | 0.2           | Alpha-1-antitrypsin                                                    | 0.4               | 0.2               | 0.1               | 0.1               | 0.1           |
| 45     | Collagen alpha-2(VI) chain                                  | 0.2               | 0.3               | 0.2               | 0.3               | 0.2           | Plasminogen                                                            | 0.2               | 0.2               | 0.1               | 0.1               | 0.1           |
| 46     | Decorin                                                     | 0.2               | 0.3               | 0.2               | 0.3               | 0.2           | Decorin                                                                | 0.2               | 0.2               | 0.1               | 0.1               | 0.1           |
| 47     | Mast cell carboxypeptidase A                                | 0.3               | 0.3               | 0.2               | 0.2               | 0.2           | Gelsolin                                                               | 0.2               | 0.2               | 0.1               | 0.1               | 0.1           |
| 48     | Serum amyloid P-component                                   | 0.3               | 0.2               | 0.3               | 0.1               | 0.2           | Prelamin-A/C                                                           | 0.3               | 0.1               | 0.1               | 0.1               | 0.1           |
| 49     | Lysozyme C                                                  | 0.2               | 0.2               | 0.2               | 0.2               | 0.2           | Heat shock protein beta-1                                              | 0.2               | 0.2               | 0.1               | 0.1               | 0.1           |
| 50     | Vitronectin                                                 | 0.1               | 0.3               | 0.1               | 0.3               | 0.2           | Peroxiredoxin-1                                                        | 0.2               | 0.2               | 0.1               | 0.1               | 0.1           |
| 51     | ATP synthase subunit beta, mitochondrial                    | 0.1               | 0.3               | 0.1               | 0.3               | 0.2           | Kallistatin                                                            | 0.2               | 0.2               | 0.1               | 0.1               | 0.1           |
| 52     | Heterogeneous nuclear ribonucleoproteins A2/B1              | 0.2               | 0.2               | 0.2               | 0.2               | 0.2           | Elongation factor 1-alpha 1                                            | 0.2               | 0.2               | 0.1               | 0.1               | 0.1           |
| 53     | Ubiquitin-40S ribosomal protein S27a                        | 0.2               | 0.2               | 0.2               | 0.2               | 0.2           | Collagen alpha-1(II) chain                                             | 0.2               | 0.1               | 0.1               | 0.1               | 0.1           |
| 54     | Elongation factor 1-alpha 1                                 | 0.2               | 0.2               | 0.1               | 0.2               | 0.2           | Insulin-like growth factor-binding protein complex acid labile subunit | 0.2               | 0.1               | 0.1               | 0.1               | 0.1           |
| 55     | Ig mu chain C region                                        | 0.2               | 0.2               | 0.1               | 0.2               | 0.2           | Antithrombin-III                                                       | 0.1               | 0.1               | 0.1               | 0.1               | 0.1           |
| 56     | Mimecan                                                     | 0.2               | 0.1               | 0.2               | 0.1               | 0.2           | Fibulin-1                                                              | 0.1               | 0.1               | 0.1               | 0.1               | 0.1           |
| 57     | Coronin-1A                                                  | 0.2               | 0.2               | 0.1               | 0.1               | 0.1           | Carboxypeptidase B2                                                    | 0.1               | 0.2               | 0.0               | 0.1               | 0.1           |
| 58     | Collagen alpha-1(XIV) chain                                 | 0.1               | 0.2               | 0.1               | 0.2               | 0.1           | Transforming growth factor-beta-induced protein ig-h3                  | 0.2               | 0.1               | 0.1               | 0.1               | 0.1           |
| 59     | Fructose-bisphosphate aldolase A                            | 0.2               | 0.1               | 0.2               | 0.1               | 0.1           | Alpha-enolase                                                          | 0.2               | 0.1               | 0.1               | 0.0               | 0.1           |
| 60     | Transmembrane protein 109                                   | 0.1               | 0.1               | 0.1               | 0.1               | 0.1           | Tropomyosin alpha-1 chain                                              | 0.1               | 0.1               | 0.0               | 0.1               | 0.1           |
| 61     | Plastin-2                                                   | 0.2               | 0.1               | 0.2               | 0.1               | 0.1           | Tubulin alpha-1A chain                                                 | 0.2               | 0.1               | 0.1               | 0.0               | 0.1           |
| 62     | Collagen alpha-1(V) chain                                   | 0.1               | 0.1               | 0.1               | 0.1               | 0.1           | Aldo-keto reductase family 1 member C4                                 | 0.1               | 0.1               | 0.0               | 0.1               | 0.0           |
| 63     | 60S ribosomal protein L7                                    | 0.1               | 0.1               | 0.1               | 0.1               | 0.1           | L-lactate dehydrogenase A chain                                        | 0.1               | 0.1               | 0.0               | 0.1               | 0.0           |
| 64     | Heat shock cognate 71 kDa protein                           | 0.1               | 0.1               | 0.1               | 0.1               | 0.1           | Lactotransferrin                                                       | 0.1               | 0.1               | 0.0               | 0.0               | 0.0           |
| 65     | Heterogeneous nuclear ribonucleoprotein A1-like 2           | 0.1               | 0.1               | 0.1               | 0.1               | 0.1           | Inter-alpha-trypsin inhibitor heavy chain H4                           | 0.1               | 0.1               | 0.0               | 0.0               | 0.0           |

| Number | Conjunctiva - control                                   | Replicate 1 emPAI | Replicate 2 emPAI | Replicate 1 mol % | Replicate 2 mol % | Average mol % | Conjunctiva - deposits      | Replicate 1 emPAI | Replicate 2 emPAI | Replicate 1 mol % | Replicate 2 mol % | Average mol % |
|--------|---------------------------------------------------------|-------------------|-------------------|-------------------|-------------------|---------------|-----------------------------|-------------------|-------------------|-------------------|-------------------|---------------|
| 66     | Lamin-B1                                                | 0.1               | 0.1               | 0.1               | 0.1               | 0.1           | Serine protease HTRA1       | 0.1               | 0.1               | 0.0               | 0.0               | 0.0           |
| 67     | Heterogeneous nuclear ribonucleoprotein K               | 0.1               | 0.2               | 0.1               | 0.1               | 0.1           | Complement C3               | 0.1               | 0.0               | 0.0               | 0.0               | 0.0           |
| 68     | Clusterin                                               | 0.1               | 0.1               | 0.1               | 0.1               | 0.1           | Collagen alpha-1(XIV) chain | 0.1               | 0.0               | 0.0               | 0.0               | 0.0           |
| 69     | 78 kDa glucose-regulated protein                        | 0.1               | 0.1               | 0.1               | 0.1               | 0.1           | Complement C4-A             | 0.0               | 0.0               | 0.0               | 0.0               | 0.0           |
| 70     | Annexin A1                                              | 0.1               | 0.1               | 0.1               | 0.1               | 0.1           | Fibrillin-1                 | 0.0               | 0.0               | 0.0               | 0.0               | 0.0           |
| 71     | Ig delta chain C region                                 | 0.1               | 0.1               | 0.1               | 0.1               | 0.1           | Tenascin-X                  | 0.0               | 0.0               | 0.0               | 0.0               | 0.0           |
| 72     | Collagen alpha-2(V) chain                               | 0.1               | 0.1               | 0.1               | 0.1               | 0.1           |                             |                   |                   |                   |                   |               |
| 73     | Guanine nucleotide-binding protein G(olf) subunit alpha | 0.1               | 0.1               | 0.1               | 0.1               | 0.1           |                             |                   |                   |                   |                   |               |
| 74     | Phosphoglycerate kinase 1                               | 0.1               | 0.1               | 0.1               | 0.1               | 0.1           |                             |                   |                   |                   |                   |               |
| 75     | Fibrillin-1                                             | 0.0               | 0.0               | 0.0               | 0.0               | 0.0           |                             |                   |                   |                   |                   |               |
| 76     | Neuroblast differentiation-associated protein AHNAK     | 0.0               | 0.0               | 0.0               | 0.0               | 0.0           |                             |                   |                   |                   |                   |               |
| 77     | Plectin                                                 | 0.0               | 0.0               | 0.0               | 0.0               | 0.0           |                             |                   |                   |                   |                   |               |

Relative protein amounts in Orbit. mol % is calculated as described by Ishihama, Y., et al., Exponentially modified protein abundance index (emPAI) for estimation of absolute protein amount in proteomics by the number of sequenced peptides per protein. Mol Cell Proteomics, 2005. 4(9): p. 1265-72

| Number | Orbit - control                           | Replicate 1 | Replicate 2 | Replicate 1 | Replicate 2 | Average | Orbit - deposits                         | Replicate 1 | Replicate 2 | Replicate 1 | Replicate 2 | Average |
|--------|-------------------------------------------|-------------|-------------|-------------|-------------|---------|------------------------------------------|-------------|-------------|-------------|-------------|---------|
|        |                                           | emPAI       | emPAI       | mol %       | mol %       | mol %   |                                          | emPAI       | emPAI       | mol %       | mol %       | mol %   |
| 1      | Hemoglobin subunit beta                   | 1227.6      | 517.7       | 78.2        | 77.7        | 78.0    | Ig kappa chain C region                  | 1399.0      | 1399.0      | 94.0        | 94.8        | 94.4    |
| 2      | Hemoglobin subunit alpha                  | 225.5       | 72.2        | 14.4        | 10.8        | 12.6    | Ig kappa chain V-I region DEE            | 9.2         | 6.6         | 0.6         | 0.4         | 0.5     |
| 3      | Hemoglobin subunit delta                  | 57.5        | 29.8        | 3.7         | 4.5         | 4.1     | Hemoglobin subunit beta                  | 7.6         | 7.6         | 0.5         | 0.5         | 0.5     |
| 4      | Ig kappa chain C region                   | 9.2         | 6.6         | 0.6         | 1.0         | 0.8     | Hemoglobin subunit alpha                 | 8.6         | 5.1         | 0.6         | 0.3         | 0.5     |
| 5      | Histone H4                                | 7.2         | 5.1         | 0.5         | 0.8         | 0.6     | Collagen alpha-1(I) chain                | 5.6         | 5.1         | 0.4         | 0.3         | 0.4     |
| 6      | Histone H2B type 1-L                      | 8.2         | 4.6         | 0.5         | 0.7         | 0.6     | Apolipoprotein E                         | 5.5         | 4.9         | 0.4         | 0.3         | 0.3     |
| 7      | Vimentin                                  | 3.7         | 3.7         | 0.2         | 0.5         | 0.4     | Serum amyloid P-component                | 3.6         | 4.3         | 0.2         | 0.3         | 0.3     |
| 8      | Collagen alpha-1(I) chain                 | 3.7         | 2.7         | 0.2         | 0.4         | 0.3     | Serum albumin                            | 4.3         | 3.3         | 0.3         | 0.2         | 0.3     |
| 9      | Actin, cytoplasmic 1                      | 2.0         | 2.6         | 0.1         | 0.4         | 0.3     | Apolipoprotein A-I                       | 3.5         | 3.5         | 0.2         | 0.2         | 0.2     |
| 10     | Collagen alpha-2(I) chain                 | 2.1         | 1.5         | 0.1         | 0.2         | 0.2     | Collagen alpha-2(I) chain                | 3.4         | 2.4         | 0.2         | 0.2         | 0.2     |
| 11     | Serum albumin                             | 1.6         | 1.3         | 0.1         | 0.2         | 0.1     | Collagen alpha-1(III) chain              | 2.7         | 2.6         | 0.2         | 0.2         | 0.2     |
| 12     | Histone H2A type 1-A                      | 1.6         | 1.1         | 0.1         | 0.2         | 0.1     | Hemoglobin subunit delta                 | 2.6         | 1.9         | 0.2         | 0.1         | 0.2     |
| 13     | Peroxiredoxin-2                           | 2.1         | 0.9         | 0.1         | 0.1         | 0.1     | Ig gamma-1 chain C region                | 1.9         | 1.4         | 0.1         | 0.1         | 0.1     |
| 14     | Ig gamma-1 chain C region                 | 1.0         | 1.2         | 0.1         | 0.2         | 0.1     | Ig lambda-2 chain C regions              | 1.4         | 1.4         | 0.1         | 0.1         | 0.1     |
| 15     | Carbonic anhydrase 1                      | 1.7         | 0.9         | 0.1         | 0.1         | 0.1     | Cystatin-C                               | 1.4         | 1.4         | 0.1         | 0.1         | 0.1     |
| 16     | Histone H2A.V                             | 0.7         | 1.1         | 0.0         | 0.2         | 0.1     | Vimentin                                 | 1.4         | 1.4         | 0.1         | 0.1         | 0.1     |
| 17     | Flavin reductase (NADPH)                  | 1.2         | 0.9         | 0.1         | 0.1         | 0.1     | Actin, cytoplasmic 1                     | 1.3         | 1.3         | 0.1         | 0.1         | 0.1     |
| 18     | Peroxiredoxin-1                           | 0.4         | 1.2         | 0.0         | 0.2         | 0.1     | Vitronectin                              | 1.5         | 1.2         | 0.1         | 0.1         | 0.1     |
| 19     | Protein S100-A6                           | 0.9         | 0.9         | 0.1         | 0.1         | 0.1     | Apolipoprotein A-IV                      | 1.0         | 1.4         | 0.1         | 0.1         | 0.1     |
| 20     | Ig lambda-2 chain C regions               | 0.8         | 0.8         | 0.1         | 0.1         | 0.1     | Ig gamma-2 chain C region                | 1.2         | 1.2         | 0.1         | 0.1         | 0.1     |
| 21     | Collagen alpha-1(III) chain               | 1.1         | 0.6         | 0.1         | 0.1         | 0.1     | Ig alpha-1 chain C region                | 1.1         | 0.9         | 0.1         | 0.1         | 0.1     |
| 22     | Histone H1.2                              | 0.6         | 0.6         | 0.0         | 0.1         | 0.1     | Transthyretin                            | 1.4         | 0.5         | 0.1         | 0.0         | 0.1     |
| 23     | Ubiquitin-40S ribosomal protein S27a      | 0.8         | 0.5         | 0.0         | 0.1         | 0.1     | Protein S100-A6                          | 0.9         | 0.9         | 0.1         | 0.1         | 0.1     |
| 24     | Tubulin beta chain                        | 0.8         | 0.4         | 0.0         | 0.1         | 0.1     | Neutrophil defensin 1                    | 0.9         | 0.9         | 0.1         | 0.1         | 0.1     |
| 25     | Glyceraldehyde-3-phosphate dehydrogenase  | 0.2         | 0.6         | 0.0         | 0.1         | 0.1     | Collagen alpha-3(VI) chain               | 0.9         | 0.8         | 0.1         | 0.1         | 0.1     |
| 26     | Fibrinogen beta chain                     | 0.4         | 0.5         | 0.0         | 0.1         | 0.0     | Collagen alpha-1(VI) chain               | 0.9         | 0.8         | 0.1         | 0.1         | 0.1     |
| 27     | Neutrophil defensin 1                     | 0.4         | 0.4         | 0.0         | 0.1         | 0.0     | Ig kappa chain V-I region EU             | 0.8         | 0.8         | 0.1         | 0.1         | 0.1     |
| 28     | Catalase                                  | 0.3         | 0.4         | 0.0         | 0.1         | 0.0     | Ig kappa chain V-III region SIE          | 0.8         | 0.8         | 0.1         | 0.1         | 0.1     |
| 29     | Ig kappa chain V-III region VG            | 0.3         | 0.3         | 0.0         | 0.0         | 0.0     | Collagen alpha-2(VI) chain               | 0.8         | 0.6         | 0.1         | 0.0         | 0.0     |
| 30     | Macrophage migration inhibitory factor    | 0.3         | 0.3         | 0.0         | 0.0         | 0.0     | Actin, aortic smooth muscle              | 0.5         | 0.7         | 0.0         | 0.0         | 0.0     |
| 31     | Elongation factor 1-alpha 1               | 0.2         | 0.3         | 0.0         | 0.0         | 0.0     | Immunoglobulin lambda-like polypeptide 5 | 0.6         | 0.6         | 0.0         | 0.0         | 0.0     |
| 32     | Tubulin alpha-1A chain                    | 0.2         | 0.3         | 0.0         | 0.0         | 0.0     | Procollagen C-endopeptidase enhancer 1   | 0.7         | 0.4         | 0.0         | 0.0         | 0.0     |
| 33     | Peptidyl-prolyl cis-trans isomerase A     | 0.5         | 0.2         | 0.0         | 0.0         | 0.0     | Metalloproteinase inhibitor 3            | 0.3         | 0.8         | 0.0         | 0.1         | 0.0     |
| 34     | Fibrinogen alpha chain                    | 0.4         | 0.2         | 0.0         | 0.0         | 0.0     | Complement component C9                  | 0.5         | 0.6         | 0.0         | 0.0         | 0.0     |
| 35     | Endoplasmic                               | 0.2         | 0.3         | 0.0         | 0.0         | 0.0     | Protein AMBP                             | 0.4         | 0.6         | 0.0         | 0.0         | 0.0     |
| 36     | Fructose-bisphosphate aldolase A          | 0.3         | 0.2         | 0.0         | 0.0         | 0.0     | Phospholipid transfer protein            | 0.6         | 0.4         | 0.0         | 0.0         | 0.0     |
| 37     | Vitronectin                               | 0.2         | 0.2         | 0.0         | 0.0         | 0.0     | Histone H2A type 1-A                     | 0.6         | 0.3         | 0.0         | 0.0         | 0.0     |
| 38     | Band 3 anion transport protein            | 0.3         | 0.2         | 0.0         | 0.0         | 0.0     | Pigment epithelium-derived factor        | 0.6         | 0.3         | 0.0         | 0.0         | 0.0     |
| 39     | Annexin A5                                | 0.5         | 0.1         | 0.0         | 0.0         | 0.0     | Complement component C8 gamma chain      | 0.4         | 0.4         | 0.0         | 0.0         | 0.0     |
| 40     | ATP synthase subunit beta, mitochondrial  | 0.4         | 0.1         | 0.0         | 0.0         | 0.0     | Alpha-1-antitrypsin                      | 0.5         | 0.3         | 0.0         | 0.0         | 0.0     |
| 41     | Peroxiredoxin-6                           | 0.3         | 0.2         | 0.0         | 0.0         | 0.0     | Clusterin                                | 0.4         | 0.3         | 0.0         | 0.0         | 0.0     |
| 42     | Heat shock cognate 71 kDa protein         | 0.2         | 0.2         | 0.0         | 0.0         | 0.0     | Ig kappa chain V-III region B6           | 0.3         | 0.3         | 0.0         | 0.0         | 0.0     |
| 43     | Thioredoxin domain-containing protein 5   | 0.3         | 0.2         | 0.0         | 0.0         | 0.0     | Immunoglobulin J chain                   | 0.5         | 0.2         | 0.0         | 0.0         | 0.0     |
| 44     | 78 kDa glucose-regulated protein          | 0.2         | 0.2         | 0.0         | 0.0         | 0.0     | Ig lambda chain V-I region HA            | 0.3         | 0.3         | 0.0         | 0.0         | 0.0     |
| 45     | Annexin A2                                | 0.1         | 0.2         | 0.0         | 0.0         | 0.0     | Cathepsin D                              | 0.3         | 0.4         | 0.0         | 0.0         | 0.0     |
| 46     | Moesin                                    | 0.2         | 0.2         | 0.0         | 0.0         | 0.0     | Ig kappa chain V-III region VG           | 0.3         | 0.3         | 0.0         | 0.0         | 0.0     |
| 47     | Triosephosphate isomerase                 | 0.3         | 0.1         | 0.0         | 0.0         | 0.0     | Lactotransferrin                         | 0.3         | 0.3         | 0.0         | 0.0         | 0.0     |
| 48     | Plastin-2                                 | 0.2         | 0.2         | 0.0         | 0.0         | 0.0     | Cathepsin K                              | 0.2         | 0.3         | 0.0         | 0.0         | 0.0     |
| 49     | Fibrinogen gamma chain                    | 0.2         | 0.2         | 0.0         | 0.0         | 0.0     | Tetranectin                              | 0.4         | 0.2         | 0.0         | 0.0         | 0.0     |
| 50     | Collagen alpha-1(II) chain                | 0.2         | 0.1         | 0.0         | 0.0         | 0.0     | Ig mu chain C region                     | 0.3         | 0.2         | 0.0         | 0.0         | 0.0     |
| 51     | Alpha-enolase                             | 0.1         | 0.2         | 0.0         | 0.0         | 0.0     | Gelsolin                                 | 0.2         | 0.2         | 0.0         | 0.0         | 0.0     |
| 52     | L-lactate dehydrogenase A chain           | 0.2         | 0.1         | 0.0         | 0.0         | 0.0     | Ubiquitin-40S ribosomal protein S27a     | 0.2         | 0.2         | 0.0         | 0.0         | 0.0     |
| 53     | 60S ribosomal protein L7                  | 0.1         | 0.1         | 0.0         | 0.0         | 0.0     | Complement C3                            | 0.2         | 0.2         | 0.0         | 0.0         | 0.0     |
| 54     | Putative heat shock protein HSP 90-beta-3 | 0.2         | 0.1         | 0.0         | 0.0         | 0.0     | Complement factor H-related protein 1    | 0.2         | 0.2         | 0.0         | 0.0         | 0.0     |

| Number | Orbit - control                                                   | Replicate 1<br>emPAI | Replicate 2<br>emPAI | Replicate 1<br>mol % | Replicate 2<br>mol % | Average<br>mol % | Orbit - deposits                                            | Replicate 1<br>emPAI | Replicate 2<br>emPAI | Replicate 1<br>mol % | Replicate 2<br>mol % | Average<br>mol % |
|--------|-------------------------------------------------------------------|----------------------|----------------------|----------------------|----------------------|------------------|-------------------------------------------------------------|----------------------|----------------------|----------------------|----------------------|------------------|
| 55     | Apolipoprotein E                                                  | 0.1                  | 0.1                  | 0.0                  | 0.0                  | 0.0              | Collagen alpha-1(II) chain                                  | 0.2                  | 0.2                  | 0.0                  | 0.0                  | 0.0              |
| 56     | Heterogeneous nuclear ribonucleoproteins A2/B1                    | 0.1                  | 0.1                  | 0.0                  | 0.0                  | 0.0              | Serine protease HTRA1                                       | 0.2                  | 0.2                  | 0.0                  | 0.0                  | 0.0              |
| 57     | Solute carrier family 2, facilitated glucose transporter member 1 | 0.1                  | 0.1                  | 0.0                  | 0.0                  | 0.0              | EGF-containing fibulin-like extracellular matrix protein 1  | 0.1                  | 0.2                  | 0.0                  | 0.0                  | 0.0              |
| 58     | Prelamin-A/C                                                      | 0.1                  | 0.1                  | 0.0                  | 0.0                  | 0.0              | Peroxiredoxin-1                                             | 0.2                  | 0.2                  | 0.0                  | 0.0                  | 0.0              |
| 59     | Annexin A6                                                        | 0.1                  | 0.1                  | 0.0                  | 0.0                  | 0.0              | Transmembrane glycoprotein NMB                              | 0.1                  | 0.2                  | 0.0                  | 0.0                  | 0.0              |
| 60     | Elongation factor 2                                               | 0.1                  | 0.0                  | 0.0                  | 0.0                  | 0.0              | Complement C1q tumor necrosis factor-related protein 5      | 0.2                  | 0.2                  | 0.0                  | 0.0                  | 0.0              |
| 61     | Pyruvate kinase PKM                                               | 0.1                  | 0.1                  | 0.0                  | 0.0                  | 0.0              | Serotransferrin                                             | 0.2                  | 0.1                  | 0.0                  | 0.0                  | 0.0              |
| 62     | Spectrin alpha chain, erythrocytic 1                              | 0.0                  | 0.0                  | 0.0                  | 0.0                  | 0.0              | Beta-2-glycoprotein 1                                       | 0.1                  | 0.2                  | 0.0                  | 0.0                  | 0.0              |
| 63     | Collagen alpha-3(VI) chain                                        | 0.1                  | 0.0                  | 0.0                  | 0.0                  | 0.0              | Plasminogen                                                 | 0.2                  | 0.1                  | 0.0                  | 0.0                  | 0.0              |
| 64     |                                                                   |                      |                      |                      |                      |                  | Secreted frizzled-related protein 4                         | 0.1                  | 0.2                  | 0.0                  | 0.0                  | 0.0              |
| 65     |                                                                   |                      |                      |                      |                      |                  | Fibulin-1                                                   | 0.1                  | 0.2                  | 0.0                  | 0.0                  | 0.0              |
| 66     |                                                                   |                      |                      |                      |                      |                  | Phospholipase D3                                            | 0.1                  | 0.1                  | 0.0                  | 0.0                  | 0.0              |
| 67     |                                                                   |                      |                      |                      |                      |                  | Plasma protease C1 inhibitor                                | 0.2                  | 0.1                  | 0.0                  | 0.0                  | 0.0              |
| 68     |                                                                   |                      |                      |                      |                      |                  | HLA class II histocompatibility antigen, DRB1-15 beta chain | 0.1                  | 0.1                  | 0.0                  | 0.0                  | 0.0              |
| 69     |                                                                   |                      |                      |                      |                      |                  | Carboxypeptidase B2                                         | 0.2                  | 0.1                  | 0.0                  | 0.0                  | 0.0              |
| 70     |                                                                   |                      |                      |                      |                      |                  | Secreted frizzled-related protein 2                         | 0.1                  | 0.1                  | 0.0                  | 0.0                  | 0.0              |
| 71     |                                                                   |                      |                      |                      |                      |                  | Complement component C8 beta chain                          | 0.1                  | 0.1                  | 0.0                  | 0.0                  | 0.0              |
| 72     |                                                                   |                      |                      |                      |                      |                  | Inter-alpha-trypsin inhibitor heavy chain H4                | 0.1                  | 0.1                  | 0.0                  | 0.0                  | 0.0              |
| 73     |                                                                   |                      |                      |                      |                      |                  | Complement factor H                                         | 0.1                  | 0.1                  | 0.0                  | 0.0                  | 0.0              |
| 74     |                                                                   |                      |                      |                      |                      |                  | Collagen alpha-1(XII) chain                                 | 0.1                  | 0.1                  | 0.0                  | 0.0                  | 0.0              |
| 75     |                                                                   |                      |                      |                      |                      |                  | Collagen alpha-2(V) chain                                   | 0.1                  | 0.1                  | 0.0                  | 0.0                  | 0.0              |
| 76     |                                                                   |                      |                      |                      |                      |                  | Collagen alpha-1(V) chain                                   | 0.1                  | 0.1                  | 0.0                  | 0.0                  | 0.0              |
| 77     |                                                                   |                      |                      |                      |                      |                  | Collagen alpha-1(XIV) chain                                 | 0.1                  | 0.1                  | 0.0                  | 0.0                  | 0.0              |
| 78     |                                                                   |                      |                      |                      |                      |                  | Matrix metalloproteinase-9                                  | 0.1                  | 0.1                  | 0.0                  | 0.0                  | 0.0              |
| 79     |                                                                   |                      |                      |                      |                      |                  | Coagulation factor IX                                       | 0.1                  | 0.1                  | 0.0                  | 0.0                  | 0.0              |
| 80     |                                                                   |                      |                      |                      |                      |                  | Elongation factor 1-alpha 1                                 | 0.1                  | 0.1                  | 0.0                  | 0.0                  | 0.0              |
| 81     |                                                                   |                      |                      |                      |                      |                  | Inter-alpha-trypsin inhibitor heavy chain H2                | 0.1                  | 0.1                  | 0.0                  | 0.0                  | 0.0              |
| 82     |                                                                   |                      |                      |                      |                      |                  | Fibulin-2                                                   | 0.1                  | 0.0                  | 0.0                  | 0.0                  | 0.0              |
| 83     |                                                                   |                      |                      |                      |                      |                  | Prolow-density lipoprotein receptor-related protein 1       | 0.0                  | 0.0                  | 0.0                  | 0.0                  | 0.0              |
| 84     |                                                                   |                      |                      |                      |                      |                  | Partitioning defective 3 homolog                            | 0.0                  | 0.0                  | 0.0                  | 0.0                  | 0.0              |
| 85     |                                                                   |                      |                      |                      |                      |                  | Fibrillin-1                                                 | 0.0                  | 0.0                  | 0.0                  | 0.0                  | 0.0              |



Protein comparison analysis. X indicates if a protein has been identified in both technical replicates of a given sample. Proteins marked in green are exclusively found in all amyloid cases but non of the controls.

| Accession Nr | Name                                                                 | Eyelid specimen 1 deposits | Eyelid specimen 2 deposits | Eyelid specimen 3 deposits | Conjunctiva deposits | Orbit deposits | Eyelid specimen 1 control | Eyelid specimen 2 control | Eyelid specimen 3 control | Conjunctiva control | Orbit control | Deposits | Control |
|--------------|----------------------------------------------------------------------|----------------------------|----------------------------|----------------------------|----------------------|----------------|---------------------------|---------------------------|---------------------------|---------------------|---------------|----------|---------|
| P18124       | 60S ribosomal protein L7                                             |                            |                            |                            |                      |                |                           |                           |                           | X                   | X             | 0        | 2       |
| P11021       | 78 kDa glucose-regulated protein                                     |                            |                            |                            |                      |                |                           |                           |                           | X                   | X             | 0        | 2       |
| P62736       | Actin, aortic smooth muscle                                          |                            |                            | X                          | X                    | X              |                           |                           |                           |                     |               | 3        | 0       |
| P60709       | Actin, cytoplasmic 1                                                 |                            | X                          | X                          | X                    | X              |                           | X                         |                           | X                   | X             | 4        | 3       |
| P53999       | Activated RNA polymerase II transcriptional coactivator p15          |                            |                            |                            |                      |                |                           |                           |                           | X                   |               | 0        | 1       |
| P84077       | ADP-ribosylation factor 1                                            |                            | X                          |                            |                      |                |                           |                           |                           |                     |               | 1        | 0       |
| P17516       | Aldo-keto reductase family 1 member C4                               |                            |                            |                            | X                    |                |                           |                           |                           |                     |               | 1        | 0       |
| P01011       | Alpha-1-antichymotrypsin                                             |                            | X                          | X                          | X                    |                |                           |                           |                           |                     |               | 3        | 0       |
| P01009       | Alpha-1-antitrypsin                                                  |                            |                            |                            | X                    | X              |                           |                           |                           |                     |               | 2        | 0       |
| P02489       | Alpha-crystallin A chain                                             |                            |                            |                            |                      |                |                           |                           |                           | X                   |               | 0        | 1       |
| P06733       | Alpha-enolase                                                        |                            |                            |                            | X                    |                |                           |                           |                           | X                   | X             | 1        | 2       |
| P04083       | Annexin A1                                                           |                            |                            |                            |                      |                |                           |                           |                           | X                   |               | 0        | 1       |
| P07355       | Annexin A2                                                           |                            | X                          | X                          | X                    |                |                           | X                         |                           | X                   | X             | 3        | 3       |
| P08758       | Annexin A5                                                           |                            | X                          |                            | X                    |                |                           | X                         |                           | X                   | X             | 2        | 3       |
| P08133       | Annexin A6                                                           |                            |                            |                            |                      |                |                           |                           |                           |                     | X             | 0        | 1       |
| P01008       | Antithrombin-III                                                     |                            |                            |                            | X                    |                |                           |                           |                           |                     |               | 1        | 0       |
| P02647       | Apolipoprotein A-I                                                   | X                          | X                          | X                          | X                    | X              |                           |                           |                           |                     |               | 5        | 0       |
| P02652       | Apolipoprotein A-II                                                  |                            | X                          |                            |                      |                |                           |                           |                           |                     |               | 1        | 0       |
| P06727       | Apolipoprotein A-IV                                                  | X                          | X                          | X                          | X                    | X              | X                         | X                         | X                         | X                   |               | 5        | 4       |
| P02656       | Apolipoprotein C-III                                                 |                            | X                          |                            |                      |                |                           |                           |                           |                     |               | 1        | 0       |
| P05090       | Apolipoprotein D                                                     |                            | X                          |                            | X                    |                |                           |                           |                           |                     |               | 2        | 0       |
| P02649       | Apolipoprotein E                                                     | X                          | X                          | X                          | X                    | X              | X                         | X                         |                           |                     |               | 5        | 3       |
| P06576       | ATP synthase subunit beta, mitochondrial                             |                            |                            |                            |                      |                |                           |                           |                           | X                   | X             | 0        | 2       |
| P02730       | Band 3 anion transport protein                                       |                            |                            |                            |                      |                |                           |                           | X                         |                     | X             | 0        | 2       |
| P98160       | Basement membrane-specific heparan sulfate proteoglycan core protein |                            |                            | X                          |                      |                |                           |                           |                           |                     |               | 1        | 0       |
| P02749       | Beta-2-glycoprotein 1                                                |                            |                            |                            |                      | X              |                           |                           |                           |                     |               | 1        | 0       |
| Q99731       | C-C motif chemokine 19                                               |                            |                            |                            | X                    |                |                           |                           |                           |                     |               | 1        | 0       |
| P12830       | Cadherin-1                                                           |                            | X                          |                            |                      |                |                           |                           |                           |                     |               | 1        | 0       |
| P00915       | Carbonic anhydrase 1                                                 |                            |                            | X                          |                      |                |                           |                           |                           |                     | X             | 1        | 2       |
| P00918       | Carbonic anhydrase 2                                                 |                            |                            |                            |                      |                |                           |                           | X                         |                     |               | 0        | 1       |
| Q96IV4       | Carboxypeptidase B2                                                  | X                          | X                          | X                          | X                    | X              |                           |                           |                           |                     |               | 5        | 0       |
| P04040       | Catalase                                                             |                            |                            |                            |                      |                |                           |                           | X                         |                     | X             | 0        | 2       |
| P07339       | Cathepsin D                                                          |                            |                            |                            |                      | X              |                           |                           |                           |                     |               | 1        | 0       |
| P43235       | Cathepsin K                                                          |                            |                            |                            |                      | X              |                           |                           |                           |                     |               | 1        | 0       |
| P10909       | Clusterin                                                            | X                          | X                          | X                          | X                    | X              | X                         |                           |                           | X                   |               | 5        | 2       |
| P00740       | Coagulation factor IX                                                |                            | X                          |                            |                      | X              |                           |                           |                           |                     |               | 2        | 0       |
| P02452       | Collagen alpha-1(I) chain                                            | X                          | X                          | X                          | X                    | X              | X                         | X                         | X                         | X                   | X             | 5        | 5       |
| P02458       | Collagen alpha-1(II) chain                                           | X                          | X                          | X                          | X                    | X              | X                         | X                         | X                         | X                   | X             | 5        | 4       |
| P02461       | Collagen alpha-1(III) chain                                          | X                          | X                          | X                          | X                    | X              | X                         | X                         | X                         | X                   | X             | 5        | 5       |
| P20908       | Collagen alpha-1(V) chain                                            |                            | X                          | X                          | X                    | X              |                           | X                         | X                         | X                   |               | 3        | 3       |
| P12109       | Collagen alpha-1(VI) chain                                           | X                          | X                          | X                          | X                    | X              | X                         | X                         | X                         | X                   |               | 5        | 4       |
| P27658       | Collagen alpha-1(VIII) chain                                         |                            |                            | X                          |                      |                |                           |                           |                           |                     |               | 1        | 0       |
| Q99715       | Collagen alpha-1(XII) chain                                          |                            |                            |                            |                      | X              |                           |                           |                           |                     |               | 1        | 0       |
| Q05707       | Collagen alpha-1(XIV) chain                                          |                            | X                          | X                          | X                    | X              |                           | X                         |                           | X                   |               | 4        | 2       |
| P39060       | Collagen alpha-1(XVIII) chain                                        |                            | X                          |                            |                      |                |                           |                           |                           |                     |               | 1        | 0       |
| P08123       | Collagen alpha-2(I) chain                                            | X                          | X                          | X                          | X                    | X              | X                         | X                         | X                         | X                   | X             | 5        | 5       |
| P05997       | Collagen alpha-2(V) chain                                            |                            | X                          |                            |                      | X              |                           |                           | X                         | X                   |               | 2        | 2       |
| P12110       | Collagen alpha-2(VI) chain                                           | X                          | X                          | X                          | X                    | X              | X                         | X                         | X                         | X                   |               | 5        | 4       |
| P12111       | Collagen alpha-3(VI) chain                                           | X                          | X                          | X                          | X                    | X              | X                         | X                         | X                         | X                   | X             | 5        | 5       |
| P02747       | Complement C1q subcomponent subunit C                                | X                          |                            |                            |                      |                |                           |                           |                           |                     |               | 1        | 0       |
| Q9BXJ0       | Complement C1q tumor necrosis factor-related protein 5               |                            |                            |                            |                      | X              |                           |                           |                           |                     |               | 1        | 0       |
| P01024       | Complement C3                                                        |                            | X                          | X                          | X                    | X              |                           |                           |                           |                     |               | 4        | 0       |
| P0C0L4       | Complement C4-A                                                      |                            |                            |                            | X                    |                |                           |                           |                           |                     |               | 1        | 0       |
| P07358       | Complement component C8 beta chain                                   |                            | X                          |                            |                      | X              |                           |                           |                           |                     |               | 2        | 0       |
| P07360       | Complement component C8 gamma chain                                  |                            | X                          |                            |                      | X              |                           |                           |                           |                     |               | 2        | 0       |
| P02748       | Complement component C9                                              | X                          | X                          | X                          | X                    | X              |                           |                           |                           |                     |               | 5        | 0       |
| P08603       | Complement factor H                                                  |                            |                            |                            |                      | X              |                           |                           |                           |                     |               | 1        | 0       |
| Q03591       | Complement factor H-related protein 1                                |                            | X                          |                            |                      | X              |                           |                           |                           |                     |               | 2        | 0       |
| P31146       | Coronin-1A                                                           |                            |                            |                            |                      |                |                           |                           |                           | X                   |               | 0        | 1       |

| Accession Nr | Name                                                        | Eyelid specimen<br>1 deposits | Eyelid specimen<br>2 deposits | Eyelid specimen<br>3 deposits | Conjunctiva<br>deposits | Orbit<br>deposits | Eyelid<br>specimen 1<br>control | Eyelid specimen<br>2 control | Eyelid specimen<br>3 control | Conjunctiva<br>control | Orbit control | Deposits | Control |
|--------------|-------------------------------------------------------------|-------------------------------|-------------------------------|-------------------------------|-------------------------|-------------------|---------------------------------|------------------------------|------------------------------|------------------------|---------------|----------|---------|
| P01034       | Cystatin-C                                                  |                               |                               |                               |                         | X                 |                                 |                              |                              |                        |               | 1        | 0       |
| P07585       | Decorin                                                     |                               |                               |                               | X                       |                   |                                 | X                            |                              | X                      |               | 1        | 2       |
| Q07507       | Dermatopontin                                               |                               | X                             |                               |                         |                   |                                 |                              | X                            |                        |               | 1        | 1       |
| P81605       | Dermcidin                                                   |                               | X                             |                               |                         |                   | X                               |                              | X                            |                        |               | 1        | 2       |
| Q12805       | EGF-containing fibulin-like extracellular matrix protein 1  |                               | X                             |                               |                         |                   |                                 |                              |                              |                        |               | 2        | 0       |
| P68104       | Elongation factor 1-alpha 1                                 |                               |                               |                               | X                       | X                 |                                 |                              |                              | X                      | X             | 2        | 2       |
| P13639       | Elongation factor 2                                         |                               |                               |                               |                         |                   |                                 |                              |                              |                        | X             | 0        | 1       |
| P14625       | Endoplasmin                                                 |                               |                               |                               |                         |                   |                                 | X                            |                              | X                      | X             | 0        | 3       |
| P02792       | Ferritin light chain                                        |                               |                               |                               |                         |                   |                                 | X                            |                              |                        |               | 0        | 1       |
| P35555       | Fibrillin-1                                                 |                               | X                             |                               | X                       | X                 |                                 | X                            |                              | X                      |               | 3        | 2       |
| P02671       | Fibrinogen alpha chain                                      |                               |                               | X                             |                         |                   |                                 |                              | X                            |                        | X             | 1        | 2       |
| P02675       | Fibrinogen beta chain                                       |                               |                               | X                             |                         |                   |                                 |                              | X                            |                        | X             | 1        | 2       |
| P02679       | Fibrinogen gamma chain                                      |                               |                               | X                             |                         |                   |                                 |                              | X                            |                        | X             | 1        | 2       |
| P02751       | Fibronectin                                                 |                               |                               | X                             |                         |                   |                                 |                              |                              |                        |               | 1        | 0       |
| P23142       | Fibulin-1                                                   | X                             | X                             | X                             | X                       | X                 |                                 |                              |                              |                        |               | 5        | 0       |
| P98095       | Fibulin-2                                                   |                               |                               | X                             |                         | X                 |                                 |                              |                              |                        |               | 2        | 0       |
| Q5D862       | Flilaggrin-2                                                |                               | X                             |                               |                         |                   | X                               |                              |                              |                        |               | 1        | 2       |
| P30043       | Flavin reductase (NADPH)                                    |                               |                               |                               |                         |                   |                                 |                              | X                            |                        | X             | 0        | 2       |
| P04075       | Fructose-bisphosphate aldolase A                            |                               |                               |                               |                         |                   |                                 |                              |                              | X                      | X             | 0        | 2       |
| P06396       | Gelsolin                                                    |                               |                               | X                             | X                       | X                 |                                 |                              |                              |                        |               | 3        | 0       |
| P04406       | Glyceraldehyde-3-phosphate dehydrogenase                    |                               |                               |                               |                         |                   |                                 |                              |                              | X                      | X             | 0        | 2       |
| P38405       | Guanine nucleotide-binding protein G(olf) subunit alpha     |                               |                               |                               |                         |                   |                                 |                              |                              | X                      |               | 0        | 1       |
| P11142       | Heat shock cognate 71 kDa protein                           |                               |                               |                               |                         |                   |                                 |                              |                              | X                      | X             | 0        | 2       |
| P04792       | Heat shock protein beta-1                                   |                               |                               | X                             | X                       |                   |                                 |                              |                              |                        |               | 2        | 0       |
| P69905       | Hemoglobin subunit alpha                                    | X                             | X                             | X                             | X                       | X                 | X                               | X                            | X                            | X                      | X             | 5        | 5       |
| P68871       | Hemoglobin subunit beta                                     | X                             | X                             | X                             | X                       | X                 | X                               | X                            | X                            | X                      | X             | 5        | 5       |
| P02042       | Hemoglobin subunit delta                                    |                               | X                             | X                             |                         | X                 |                                 | X                            | X                            | X                      | X             | 3        | 4       |
| P69891       | Hemoglobin subunit gamma-1                                  |                               |                               |                               |                         |                   |                                 |                              | X                            |                        |               | 0        | 1       |
| P69892       | Hemoglobin subunit gamma-2                                  |                               |                               |                               |                         |                   |                                 |                              | X                            |                        |               | 0        | 1       |
| Q32P51       | Heterogeneous nuclear ribonucleoprotein A1-like 2           |                               |                               |                               |                         |                   |                                 |                              |                              | X                      |               | 0        | 1       |
| P61978       | Heterogeneous nuclear ribonucleoprotein K                   |                               |                               |                               |                         |                   |                                 |                              |                              | X                      |               | 0        | 1       |
| P22626       | Heterogeneous nuclear ribonucleoproteins A2/B1              |                               |                               |                               |                         |                   |                                 |                              |                              | X                      | X             | 0        | 2       |
| P16403       | Histone H1.2                                                |                               |                               |                               |                         |                   |                                 |                              |                              | X                      | X             | 0        | 3       |
| Q96QV6       | Histone H2A type 1-A                                        |                               | X                             | X                             | X                       | X                 | X                               | X                            | X                            | X                      | X             | 4        | 4       |
| Q71UJ9       | Histone H2A.V                                               |                               |                               |                               |                         |                   |                                 | X                            |                              | X                      | X             | 0        | 3       |
| Q96A08       | Histone H2B type 1-A                                        |                               | X                             |                               |                         |                   |                                 |                              |                              | X                      | X             | 1        | 0       |
| P33778       | Histone H2B type 1-B                                        |                               |                               |                               |                         |                   |                                 |                              |                              | X                      |               | 0        | 1       |
| Q99880       | Histone H2B type 1-L                                        |                               |                               |                               |                         |                   |                                 |                              |                              |                        | X             | 0        | 1       |
| P84243       | Histone H3.3                                                |                               |                               |                               |                         |                   |                                 |                              |                              | X                      |               | 0        | 1       |
| Q6NXT2       | Histone H3.3C                                               |                               |                               |                               |                         |                   |                                 | X                            | X                            |                        |               | 0        | 2       |
| P62805       | Histone H4                                                  |                               | X                             | X                             | X                       |                   | X                               | X                            | X                            | X                      | X             | 3        | 5       |
| P01911       | HLA class II histocompatibility antigen, DRB1-15 beta chain |                               |                               |                               |                         | X                 |                                 |                              |                              |                        |               | 1        | 0       |
| P01876       | Ig alpha-1 chain C region                                   |                               |                               |                               | X                       | X                 |                                 | X                            |                              | X                      |               | 2        | 2       |
| P01880       | Ig delta chain C region                                     | X                             |                               | X                             | X                       |                   | X                               |                              |                              | X                      |               | 3        | 2       |
| P01857       | Ig gamma-1 chain C region                                   |                               | X                             | X                             | X                       | X                 |                                 | X                            |                              | X                      | X             | 4        | 3       |
| P01859       | Ig gamma-2 chain C region                                   |                               |                               | X                             | X                       | X                 |                                 |                              |                              | X                      |               | 3        | 1       |
| P01860       | Ig gamma-3 chain C region                                   |                               | X                             |                               | X                       |                   |                                 | X                            |                              | X                      |               | 2        | 2       |
| P01861       | Ig gamma-4 chain C region                                   |                               | X                             |                               |                         |                   |                                 |                              |                              |                        |               | 1        | 0       |
| P01763       | Ig heavy chain V-III region WEA                             |                               |                               |                               |                         |                   |                                 | X                            |                              | X                      |               | 0        | 2       |
| P01834       | Ig kappa chain C region                                     | X                             | X                             | X                             | X                       | X                 | X                               | X                            |                              | X                      | X             | 5        | 4       |
| P01597       | Ig kappa chain V-I region DEE                               |                               | X                             |                               |                         | X                 |                                 |                              |                              |                        |               | 2        | 0       |
| P01598       | Ig kappa chain V-I region EU                                |                               | X                             |                               |                         | X                 |                                 |                              |                              |                        |               | 2        | 0       |
| P01605       | Ig kappa chain V-I region Lay                               |                               |                               | X                             | X                       |                   |                                 |                              |                              | X                      |               | 2        | 1       |
| P01614       | Ig kappa chain V-II region Cum                              |                               | X                             | X                             |                         |                   |                                 |                              |                              |                        |               | 2        | 0       |
| P01619       | Ig kappa chain V-III region B6                              |                               |                               |                               |                         | X                 |                                 |                              |                              |                        |               | 1        | 0       |
| P01620       | Ig kappa chain V-III region SIE                             |                               | X                             |                               | X                       | X                 | X                               | X                            |                              | X                      |               | 3        | 3       |
| P04433       | Ig kappa chain V-III region VG                              |                               | X                             | X                             |                         | X                 |                                 |                              |                              |                        | X             | 3        | 1       |
| P01623       | Ig kappa chain V-III region VWOL                            | X                             |                               | X                             |                         | X                 |                                 |                              |                              |                        |               | 1        | 0       |
| P06316       | Ig lambda chain V-I region BL2                              |                               |                               | X                             |                         |                   |                                 |                              |                              |                        |               | 1        | 0       |
| P01700       | Ig lambda chain V-I region HA                               |                               | X                             |                               |                         | X                 |                                 |                              |                              |                        |               | 2        | 0       |
| P01702       | Ig lambda chain V-I region NIG-64                           |                               |                               | X                             |                         |                   |                                 |                              |                              |                        |               | 1        | 0       |

| Accession Nr | Name                                                                   | Eyelid specimen<br>1 deposits | Eyelid specimen<br>2 deposits | Eyelid specimen<br>3 deposits | Conjunctiva<br>deposits | Orbit<br>deposits | Eyelid<br>specimen 1<br>control | Eyelid specimen<br>2 control | Eyelid specimen<br>3 control | Conjunctiva<br>control | Orbit control | Deposits | Control |
|--------------|------------------------------------------------------------------------|-------------------------------|-------------------------------|-------------------------------|-------------------------|-------------------|---------------------------------|------------------------------|------------------------------|------------------------|---------------|----------|---------|
| P80748       | Ig lambda chain V-III region LOI                                       |                               | X                             |                               |                         |                   |                                 | X                            |                              |                        |               | 1        | 1       |
| P0CG05       | Ig lambda-2 chain C regions                                            |                               | X                             | X                             | X                       | X                 |                                 | X                            | X                            | X                      | X             | 4        | 4       |
| P01871       | Ig mu chain C region                                                   |                               |                               |                               |                         | X                 |                                 |                              |                              |                        |               | 1        | 1       |
| P01591       | Immunoglobulin J chain                                                 |                               |                               |                               |                         | X                 |                                 |                              |                              |                        |               | 1        | 0       |
| P15814       | Immunoglobulin lambda-like polypeptide 1                               |                               |                               | X                             |                         |                   |                                 |                              |                              |                        |               | 1        | 0       |
| B9A064       | Immunoglobulin lambda-like polypeptide 5                               |                               | X                             |                               | X                       | X                 |                                 |                              |                              |                        |               | 3        | 0       |
| P35858       | Insulin-like growth factor-binding protein complex acid labile subunit | X                             | X                             |                               | X                       |                   |                                 |                              |                              |                        |               | 3        | 0       |
| P19823       | Inter-alpha-trypsin inhibitor heavy chain H2                           |                               |                               |                               |                         | X                 |                                 |                              |                              |                        |               | 1        | 0       |
| Q14624       | Inter-alpha-trypsin inhibitor heavy chain H4                           |                               |                               |                               | X                       | X                 |                                 |                              |                              |                        |               | 2        | 0       |
| P29622       | Kallistatin                                                            |                               | X                             | X                             | X                       |                   |                                 |                              |                              |                        |               | 3        | 0       |
| P00338       | L-lactate dehydrogenase A chain                                        |                               |                               |                               | X                       |                   |                                 | X                            |                              |                        | X             | 1        | 2       |
| P02788       | Lactotransferrin                                                       |                               |                               |                               | X                       | X                 |                                 |                              |                              |                        |               | 2        | 0       |
| P20700       | Lamin-B1                                                               |                               |                               |                               |                         |                   |                                 |                              |                              | X                      |               | 0        | 1       |
| P18428       | Lipopolysaccharide-binding protein                                     | X                             | X                             | X                             |                         |                   |                                 |                              |                              |                        |               | 3        | 0       |
| P51884       | Lumican                                                                |                               | X                             | X                             |                         |                   |                                 | X                            | X                            |                        |               | 2        | 2       |
| P61626       | Lysozyme C                                                             |                               | X                             |                               |                         |                   |                                 |                              |                              | X                      |               | 2        | 1       |
| P14174       | Macrophage migration inhibitory factor                                 |                               |                               |                               | X                       |                   |                                 |                              |                              |                        |               | 0        | 1       |
| P15088       | Mast cell carboxypeptidase A                                           |                               |                               |                               |                         |                   |                                 | X                            |                              | X                      |               | 0        | 2       |
| P08493       | Matrix Gla protein                                                     |                               | X                             | X                             |                         |                   |                                 |                              |                              |                        |               | 2        | 0       |
| P14780       | Matrix metalloproteinase-9                                             |                               |                               |                               |                         | X                 |                                 |                              |                              |                        |               | 1        | 0       |
| P35625       | Metalloproteinase inhibitor 3                                          |                               |                               |                               |                         | X                 |                                 |                              |                              |                        |               | 1        | 0       |
| P20774       | Mimecan                                                                |                               |                               |                               |                         |                   |                                 |                              | X                            | X                      |               | 0        | 2       |
| P26038       | Moesin                                                                 |                               |                               |                               |                         |                   |                                 |                              |                              |                        | X             | 0        | 1       |
| Q09666       | Neuroblast differentiation-associated protein AHNAK                    |                               |                               |                               |                         |                   |                                 |                              |                              | X                      |               | 0        | 1       |
| P59665       | Neutrophil defensin 1                                                  | X                             | X                             |                               | X                       | X                 | X                               |                              | X                            | X                      | X             | 4        | 4       |
| Q8TEW0       | Partitioning defective 3 homolog                                       |                               |                               |                               |                         | X                 |                                 |                              |                              |                        |               | 1        | 0       |
| P62937       | Peptidyl-prolyl cis-trans isomerase A                                  |                               |                               |                               |                         |                   |                                 |                              |                              |                        | X             | 0        | 1       |
| P23284       | Peptidyl-prolyl cis-trans isomerase B                                  |                               | X                             |                               |                         |                   |                                 |                              |                              |                        |               | 1        | 0       |
| Q06830       | Peroxiredoxin-1                                                        |                               | X                             |                               | X                       | X                 |                                 | X                            |                              | X                      | X             | 3        | 3       |
| P32119       | Peroxiredoxin-2                                                        |                               |                               |                               |                         |                   |                                 |                              | X                            |                        | X             | 0        | 2       |
| P30041       | Peroxiredoxin-6                                                        |                               |                               |                               |                         |                   |                                 |                              |                              |                        | X             | 0        | 1       |
| P00558       | Phosphoglycerate kinase 1                                              |                               |                               |                               |                         |                   |                                 |                              |                              | X                      |               | 0        | 1       |
| P14555       | Phospholipase A2, membrane associated                                  | X                             | X                             |                               | X                       |                   | X                               |                              |                              |                        |               | 3        | 1       |
| Q8IV08       | Phospholipase D3                                                       |                               |                               |                               |                         | X                 |                                 |                              |                              |                        |               | 1        | 0       |
| P55058       | Phospholipid transfer protein                                          | X                             | X                             |                               | X                       | X                 |                                 |                              |                              |                        |               | 4        | 0       |
| P36955       | Pigment epithelium-derived factor                                      |                               | X                             |                               | X                       | X                 |                                 |                              |                              |                        |               | 3        | 0       |
| P05155       | Plasma protease C1 inhibitor                                           |                               |                               |                               |                         | X                 |                                 |                              |                              |                        |               | 1        | 0       |
| P00747       | Plasminogen                                                            | X                             | X                             | X                             | X                       | X                 |                                 |                              |                              |                        |               | 5        | 0       |
| P13796       | Plastin-2                                                              |                               |                               |                               |                         |                   |                                 | X                            |                              | X                      | X             | 0        | 3       |
| Q15149       | Plectin                                                                |                               |                               |                               |                         |                   |                                 |                              |                              | X                      |               | 0        | 1       |
| Q02545       | Prelamin-A/C                                                           |                               | X                             | X                             | X                       |                   |                                 | X                            |                              | X                      | X             | 3        | 3       |
| Q15113       | Procollagen C-endopeptidase enhancer 1                                 |                               |                               |                               |                         |                   |                                 |                              |                              |                        |               | 1        | 0       |
| P07737       | Profilin-1                                                             |                               |                               |                               |                         | X                 |                                 |                              |                              | X                      |               | 0        | 1       |
| Q07954       | Prolow-density lipoprotein receptor-related protein 1                  |                               |                               |                               |                         | X                 |                                 |                              |                              |                        |               | 1        | 0       |
| P41222       | Prostaglandin-H2 D-isomerase                                           |                               | X                             |                               |                         |                   |                                 |                              |                              |                        |               | 1        | 0       |
| P02760       | Protein AMBP                                                           |                               | X                             |                               |                         | X                 |                                 |                              |                              |                        |               | 2        | 0       |
| P06703       | Protein S100-A6                                                        | X                             | X                             | X                             | X                       | X                 |                                 | X                            |                              | X                      | X             | 5        | 3       |
| P00734       | Prothrombin                                                            |                               | X                             |                               |                         |                   |                                 |                              |                              |                        |               | 1        | 0       |
| Q58FF7       | Putative heat shock protein HSP 90-beta-3                              |                               |                               |                               |                         |                   |                                 |                              |                              |                        |               | 0        | 1       |
| P14618       | Pyruvate kinase PKM                                                    |                               |                               |                               |                         |                   |                                 |                              |                              |                        | X             | 0        | 1       |
| Q96HF1       | Secreted frizzled-related protein 2                                    |                               | X                             |                               |                         | X                 |                                 |                              |                              |                        |               | 2        | 0       |
| Q6FHJ7       | Secreted frizzled-related protein 4                                    |                               |                               |                               |                         | X                 |                                 |                              |                              |                        |               | 1        | 0       |
| Q92743       | Serine protease HTRA1                                                  |                               | X                             |                               | X                       | X                 |                                 |                              |                              |                        |               | 3        | 0       |
| P02787       | Serotransferrin                                                        |                               |                               | X                             |                         | X                 |                                 |                              |                              |                        |               | 2        | 0       |
| P02768       | Serum albumin                                                          | X                             | X                             | X                             | X                       | X                 | X                               | X                            | X                            | X                      | X             | 5        | 5       |
| P02743       | Serum amyloid P-component                                              | X                             | X                             | X                             | X                       | X                 | X                               | X                            | X                            | X                      |               | 5        | 4       |
| P11166       | Solute carrier family 2, facilitated glucose transporter member 1      |                               |                               |                               |                         |                   |                                 |                              |                              |                        | X             | 0        | 1       |
| Q02549       | Spectrin alpha chain, erythrocytic 1                                   |                               |                               |                               |                         |                   |                                 |                              |                              |                        | X             | 0        | 1       |
| P78539       | Sushi repeat-containing protein SRPX                                   | X                             | X                             | X                             |                         |                   |                                 |                              |                              |                        |               | 3        | 0       |
| P24821       | Tenascin                                                               |                               |                               | X                             |                         |                   |                                 |                              |                              |                        |               | 1        | 0       |
| P22105       | Tenascin-X                                                             |                               |                               |                               | X                       |                   |                                 |                              |                              |                        |               | 1        | 0       |

| Accession Nr | Name                                                  | Eyelid specimen<br>1 deposits | Eyelid specimen<br>2 deposits | Eyelid specimen<br>3 deposits | Conjunctiva<br>deposits | Orbit<br>deposits | Eyelid<br>specimen 1<br>control | Eyelid specimen<br>2 control | Eyelid specimen<br>3 control | Conjunctiva<br>control | Orbit control | Deposits | Control |
|--------------|-------------------------------------------------------|-------------------------------|-------------------------------|-------------------------------|-------------------------|-------------------|---------------------------------|------------------------------|------------------------------|------------------------|---------------|----------|---------|
| P05452       | Tetranectin                                           |                               |                               |                               |                         | X                 |                                 |                              |                              |                        |               | 1        | 0       |
| Q8NBS9       | Thioredoxin domain-containing protein 5               |                               |                               |                               |                         |                   |                                 | X                            |                              |                        | X             | 0        | 2       |
| Q15582       | Transforming growth factor-beta-induced protein ig-h3 |                               |                               | X                             | X                       |                   |                                 |                              |                              |                        |               | 2        | 0       |
| P37802       | Transgelin-2                                          |                               |                               |                               |                         |                   |                                 |                              |                              | X                      |               | 0        | 1       |
| Q14956       | Transmembrane glycoprotein NMB                        |                               |                               |                               |                         | X                 |                                 |                              |                              |                        |               | 1        | 0       |
| Q9BVC6       | Transmembrane protein 109                             |                               |                               |                               |                         |                   |                                 |                              |                              | X                      |               | 0        | 1       |
| P02766       | Transthyretin                                         |                               | X                             | X                             | X                       | X                 |                                 |                              |                              |                        |               | 4        | 0       |
| P60174       | Triosephosphate isomerase                             |                               |                               |                               |                         |                   |                                 |                              |                              |                        | X             | 0        | 1       |
| P09493       | Tropomyosin alpha-1 chain                             |                               | X                             | X                             | X                       |                   |                                 | X                            |                              |                        |               | 3        | 1       |
| Q9BZJ3       | Tryptase delta                                        |                               |                               |                               |                         |                   |                                 | X                            |                              | X                      |               | 0        | 2       |
| Q71U36       | Tubulin alpha-1A chain                                |                               |                               |                               | X                       |                   |                                 |                              |                              | X                      | X             | 1        | 2       |
| P07437       | Tubulin beta chain                                    |                               |                               |                               |                         |                   |                                 |                              |                              | X                      | X             | 0        | 2       |
| P62979       | Ubiquitin-40S ribosomal protein S27a                  |                               |                               |                               |                         | X                 |                                 | X                            | X                            | X                      | X             | 1        | 4       |
| P08670       | Vimentin                                              |                               | X                             | X                             | X                       | X                 |                                 | X                            | X                            | X                      | X             | 4        | 4       |
| P04004       | Vitronectin                                           | X                             | X                             | X                             | X                       | X                 | X                               | X                            | X                            | X                      | X             | 5        | 5       |
